# Supplementary material for: New Panx-1 Blockers: Synthesis, Biological Evaluation and Molecular Dynamic Studies
Source: MDPI journal article supplement (doi:10.3390/ijms23094827), 2022-04-27
Supplement: s1 [file s1]

**Supporting Information**  
**For**  
**New Panx-1 blockers: synthesis, biological evaluation and molecular dynamic studies**

*Letizia Crocetti <sup>1</sup>, Gabriella Guerrini <sup>1</sup>, Maria Paola Giovannoni <sup>1,\*</sup>, Fabrizio Melani <sup>1</sup>, Silvia Lamanna <sup>1</sup>, Lorenzo Di Cesare Mannelli <sup>2</sup>, Elena Lucarini <sup>2</sup>, Carla Ghelardini <sup>2</sup>, Junjie Wang <sup>3</sup> and Gerhard Dahl <sup>3</sup>*

<sup>1</sup> Neurofarba, Pharmaceutical and Nutraceutical Section, University of Florence, Via Ugo Schiff 6, 50019, Sesto Fiorentino, Italy

<sup>2</sup> Neurofarba, Pharmacology and Toxicology Section, University of Florence, Viale Pieraccini 6, 50139 Florence, Italy;

<sup>3</sup> Department of Physiology and Biophysics University of Miami School of Medicine 1600 N.W. 10<sup>th</sup> Avenue Miami, Florida 33136

**\*Corresponding Author**

Prof. Maria Paola Giovannoni  
Department of Neurofarba,  
University of Florence, Via Ugo Schiff 6,  
Sesto Fiorentino, Firenze 50019, Italy.  
Tel. +39 055 4573682  
Email: [mariapaola.giovannoni@unifi.it](mailto:mariapaola.giovannoni@unifi.it)

**Table of Contents:**

1. <sup>1</sup>H-NMR and <sup>13</sup>C-NMR spectra of final compounds **3b**, **3d**, **3e**, **7a-g**, **13**, **17**, **18c**, **19b**, **19c**, **24**, **28**, **30** and of some reaction intermediates (**15b**, **15c**, **16b**, **16c**, **25**).
2. Elemental analysis (**Table S1**).
3. Dose-response curves of compounds **3c**, **4** and **7d** (**Figures S1-S3**).

<sup>1</sup>H-NMR and <sup>13</sup>C-NMR spectra of compound **3b**

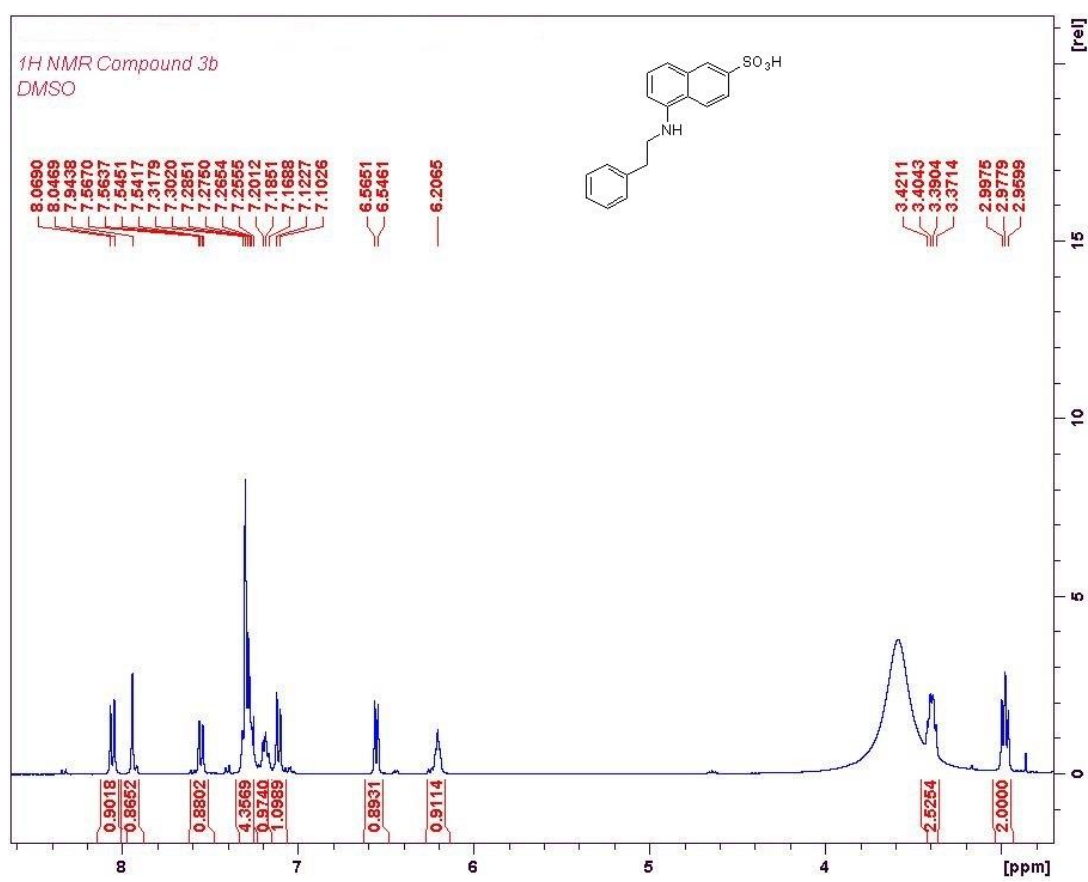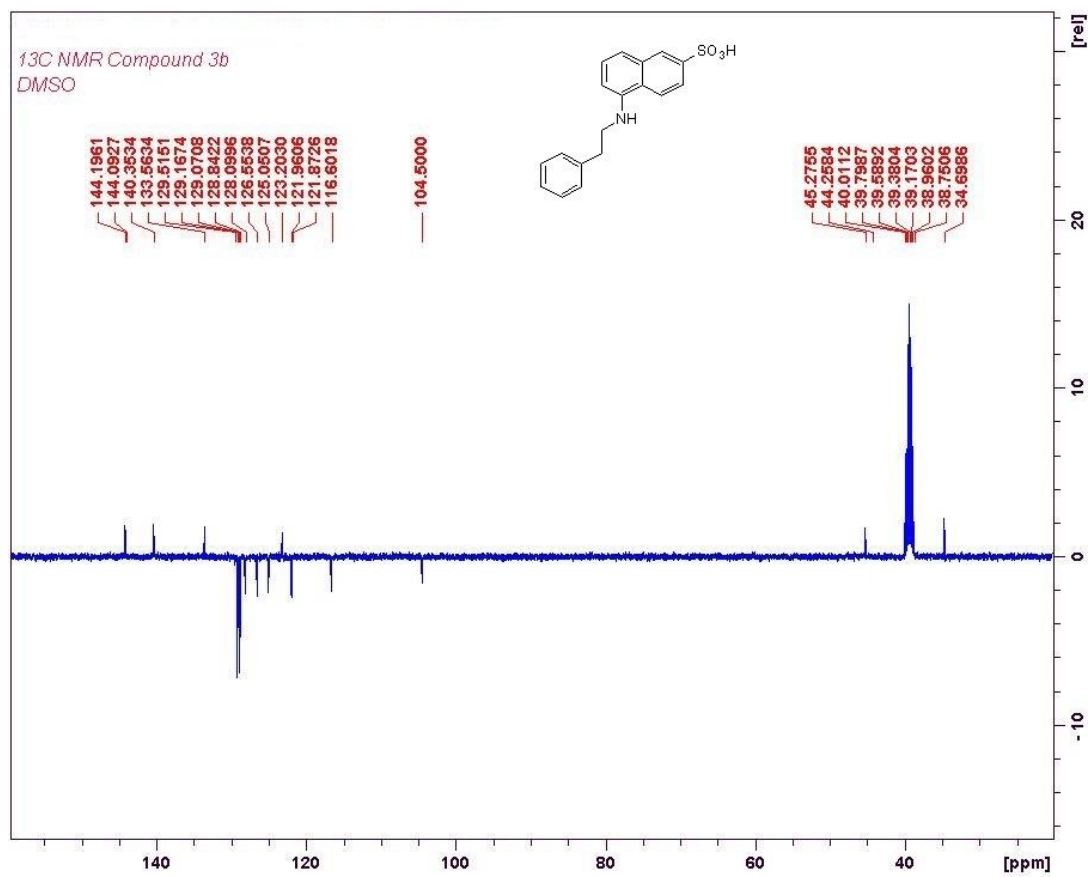

<sup>1</sup>H-NMR and <sup>13</sup>C-NMR spectra of compound **3d**

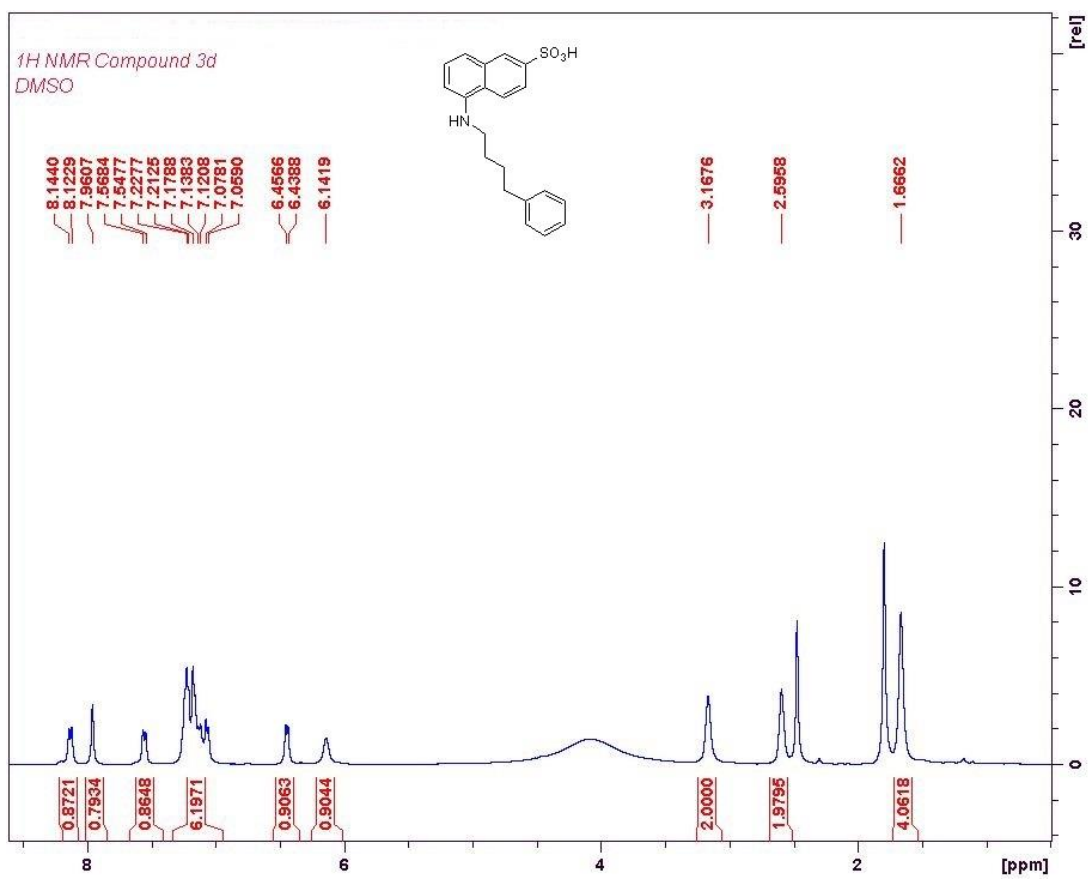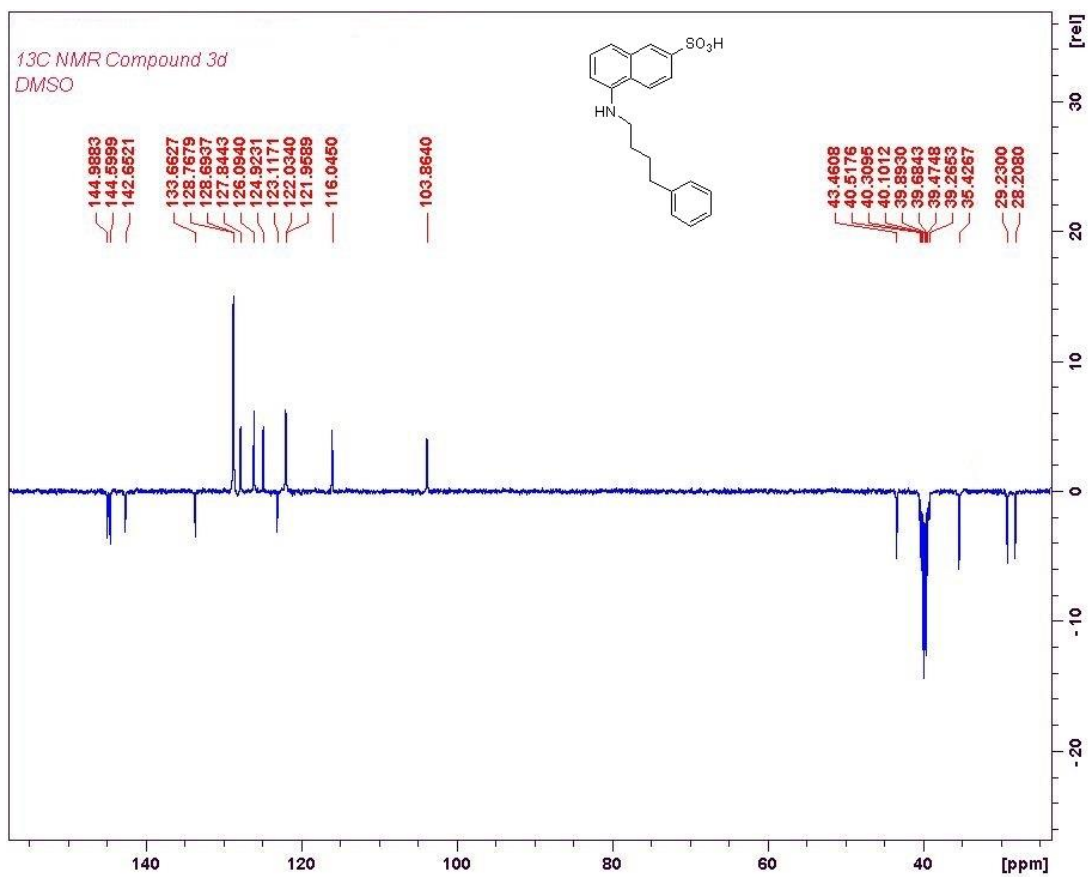

# <sup>1</sup>H-NMR and <sup>13</sup>C-NMR spectra of compound **3e**

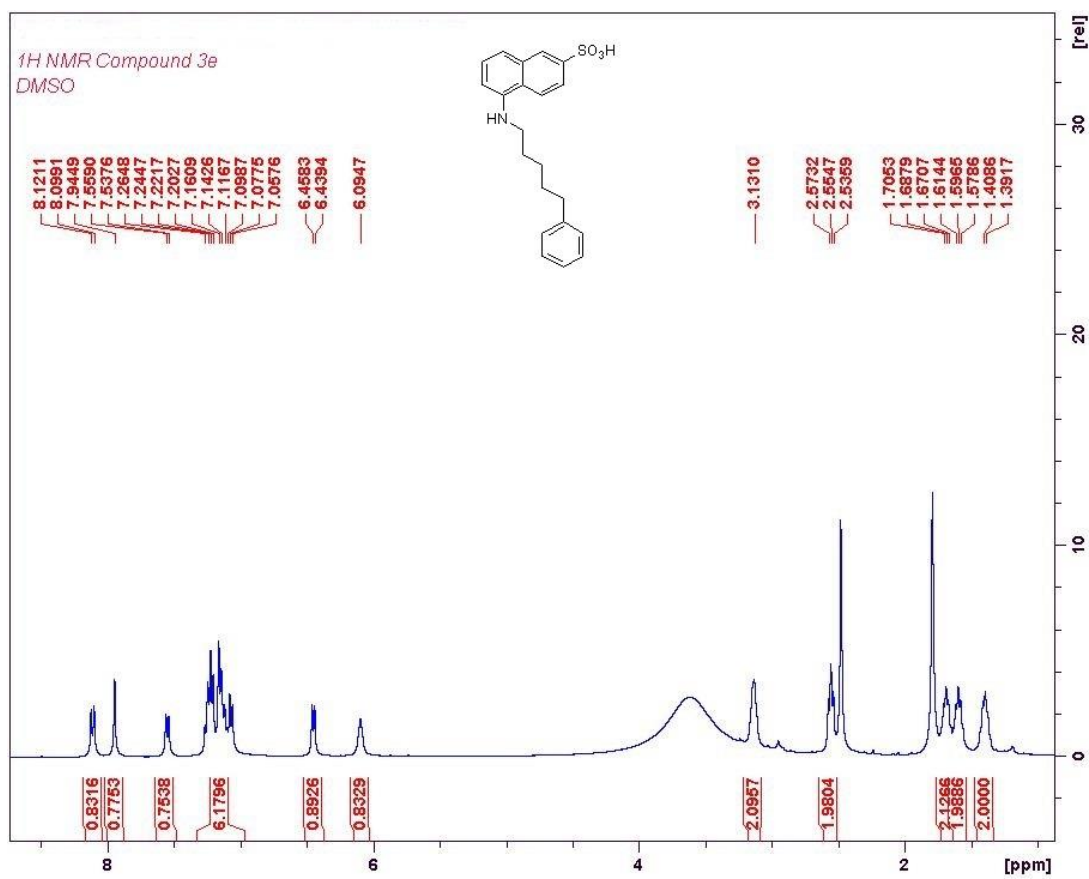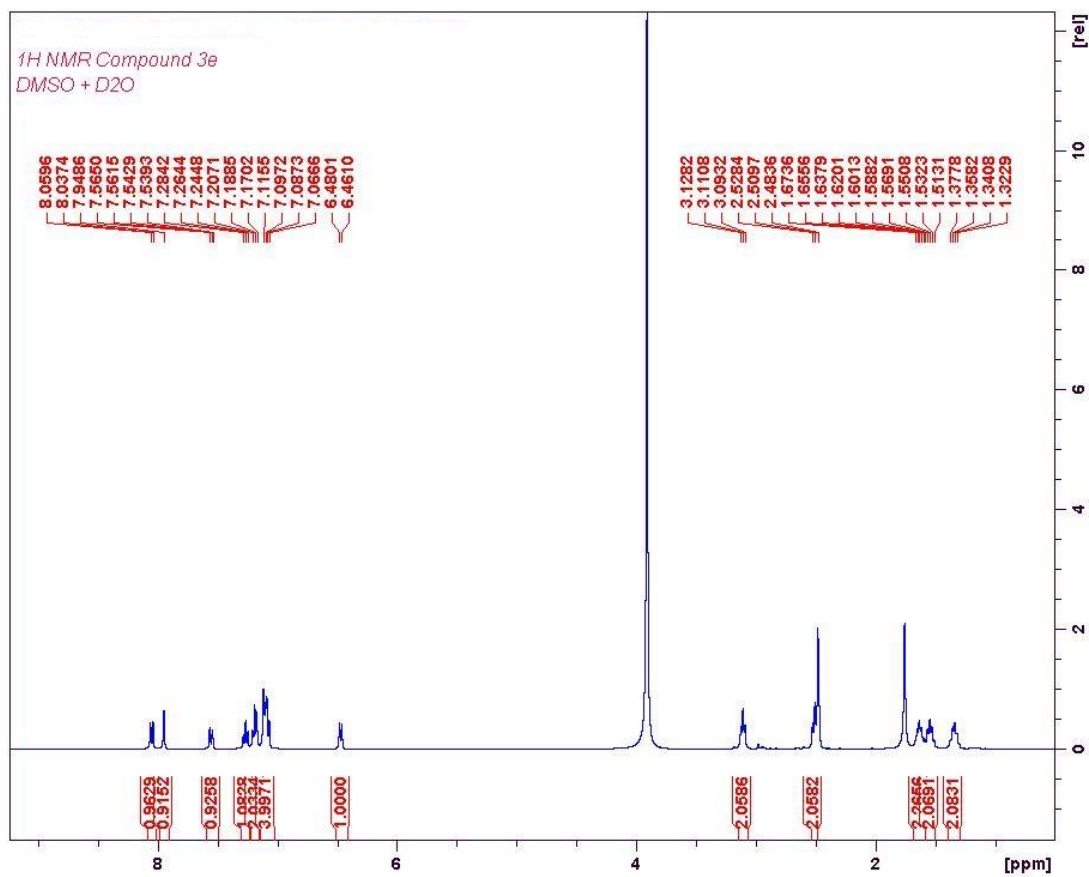

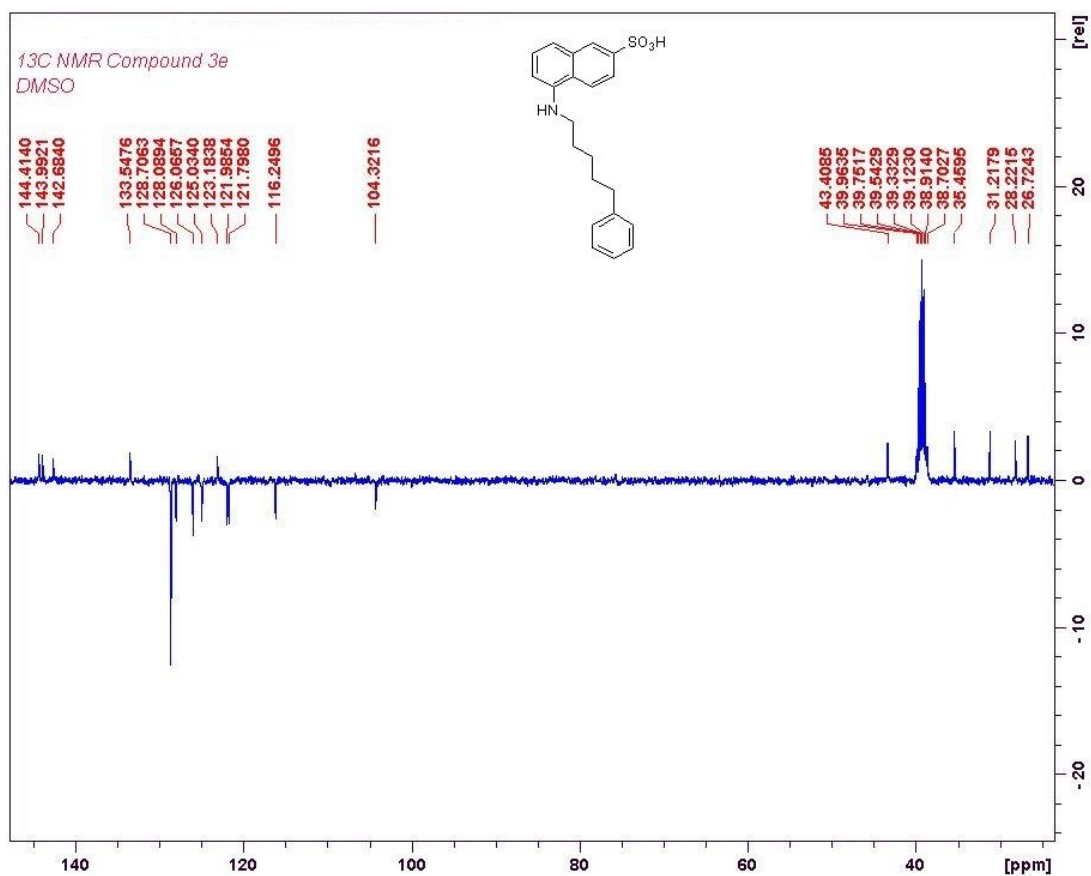

<sup>1</sup>H-NMR and <sup>13</sup>C-NMR spectra of compound **7a**

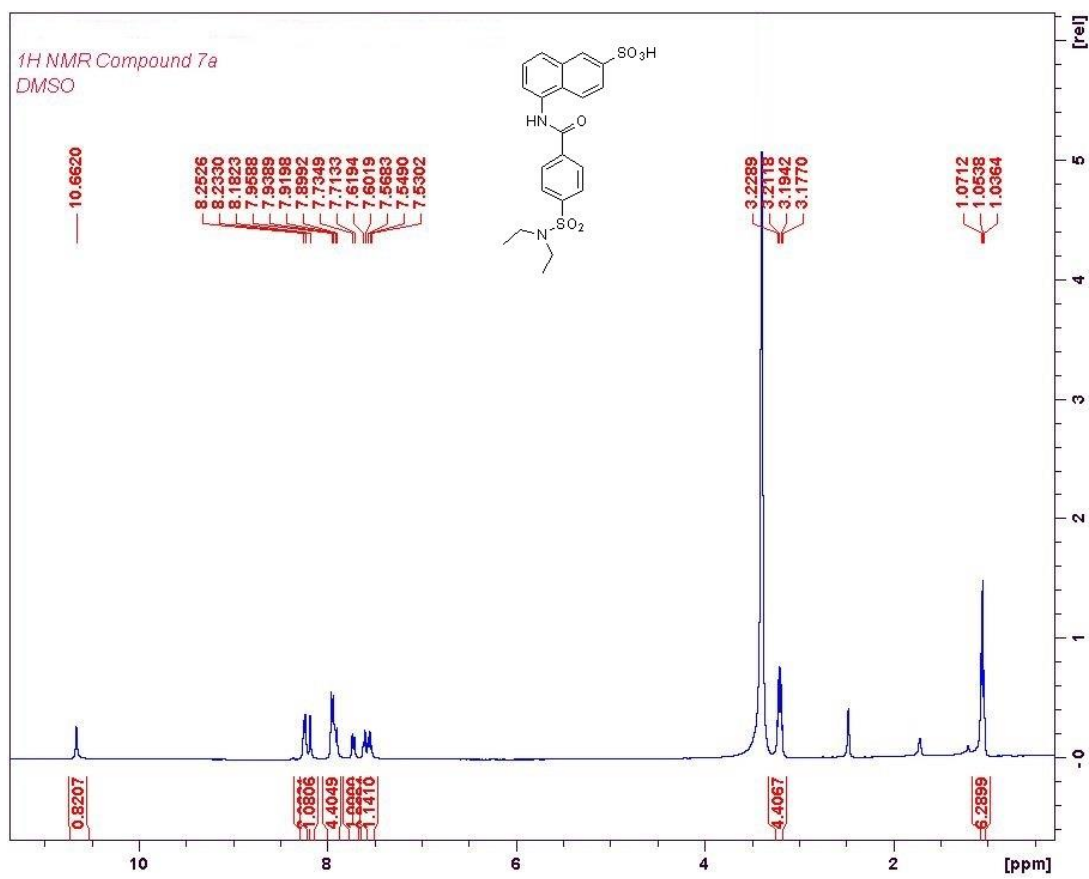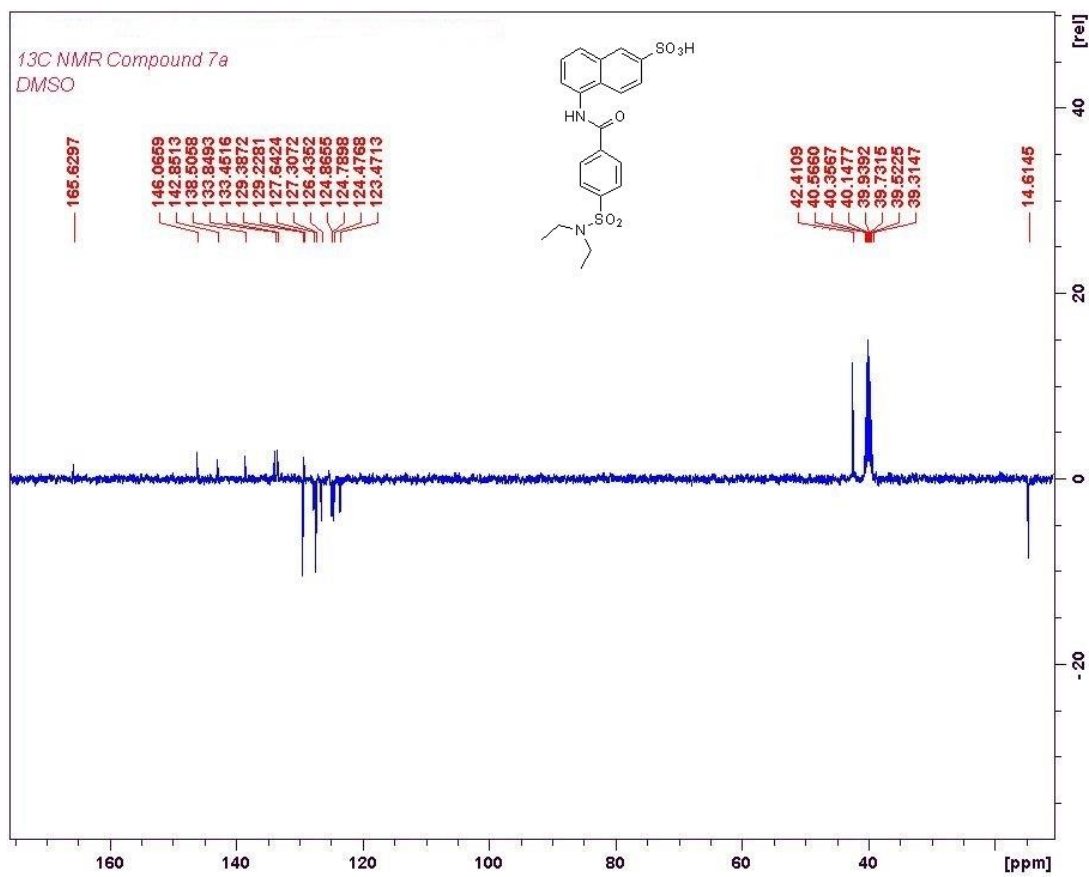

# <sup>1</sup>H-NMR and <sup>13</sup>C-NMR spectra of compound **7b**

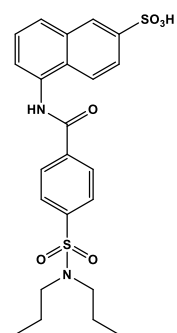

<sup>1</sup>H NMR Compound **7b**  
DMSO

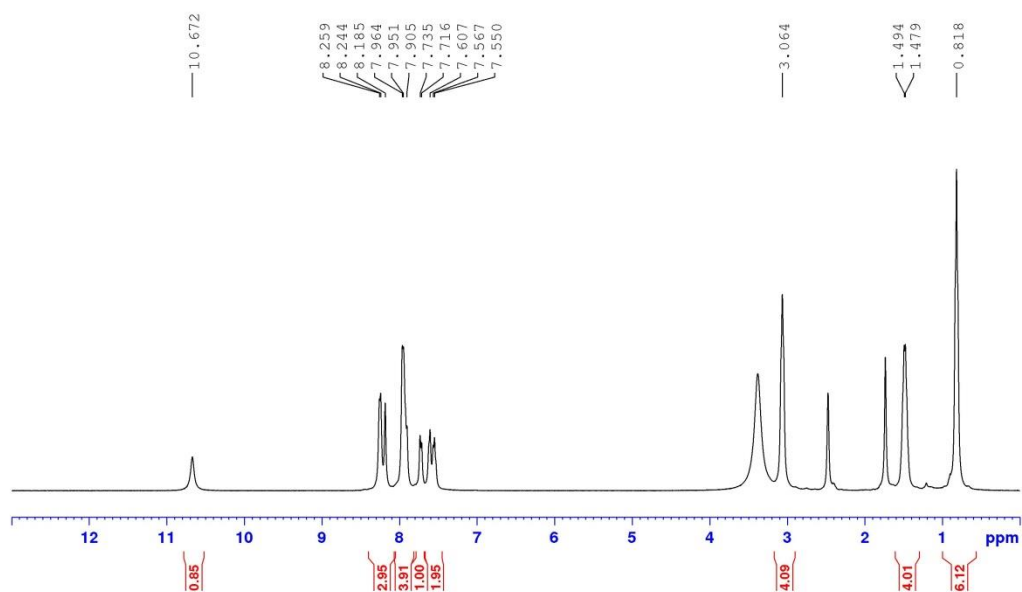

<sup>13</sup>C NMR Compound **7b**  
DMSO

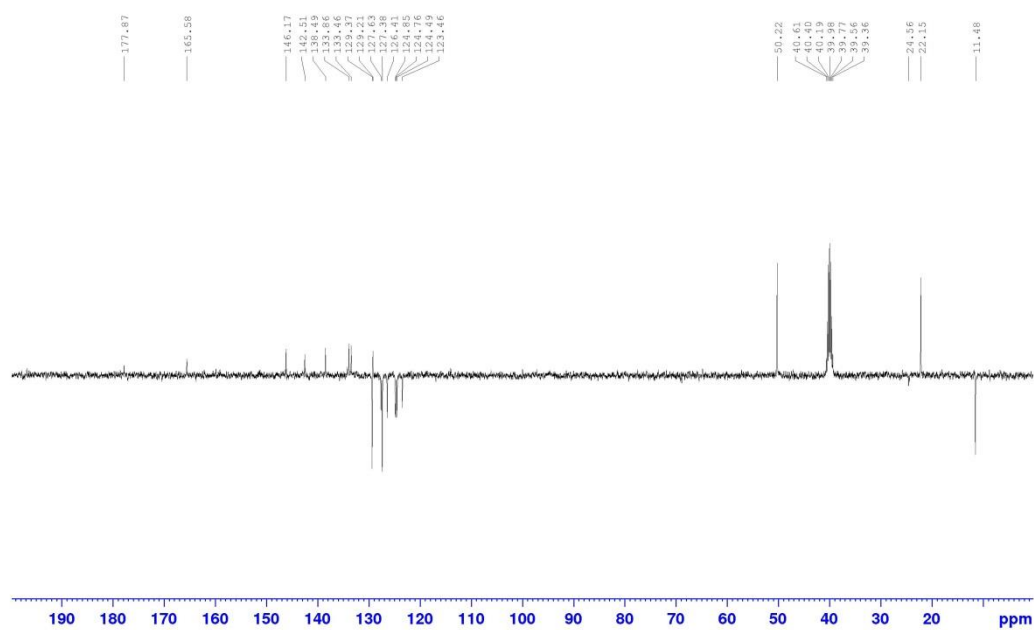

# <sup>1</sup>H-NMR and <sup>13</sup>C-NMR spectra of compound **7c**

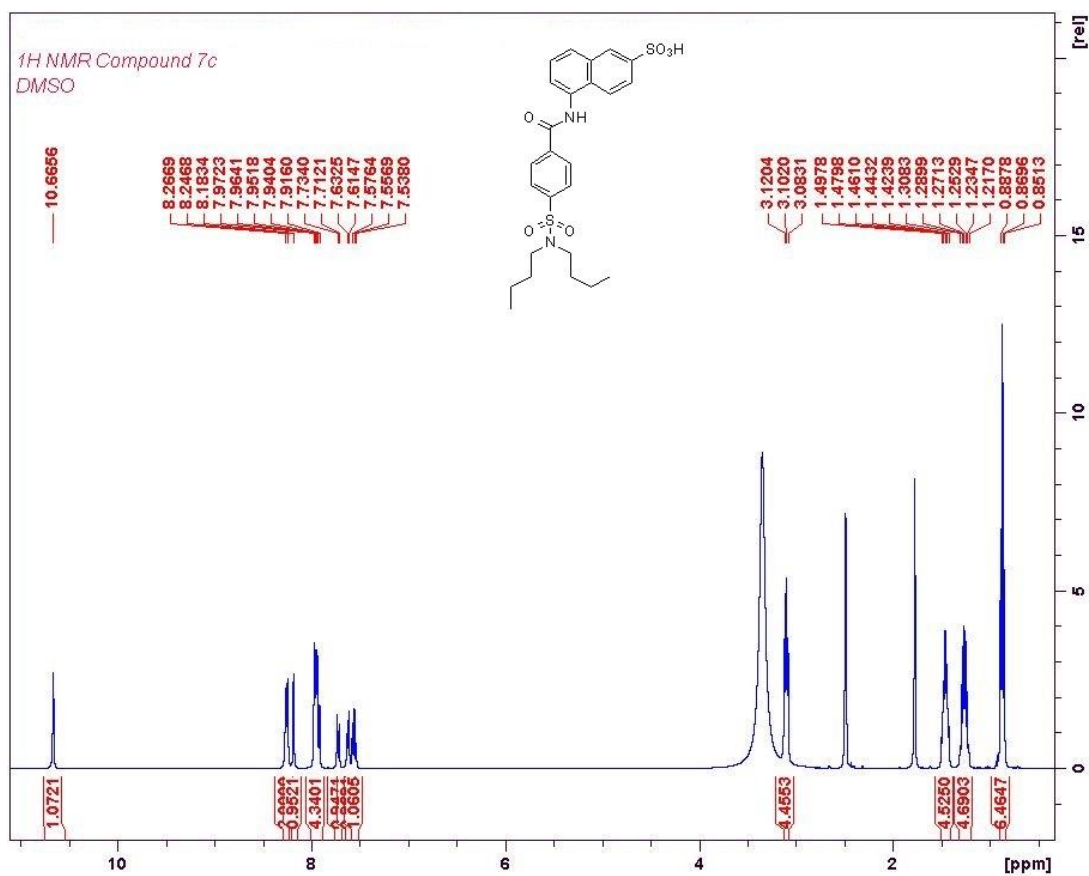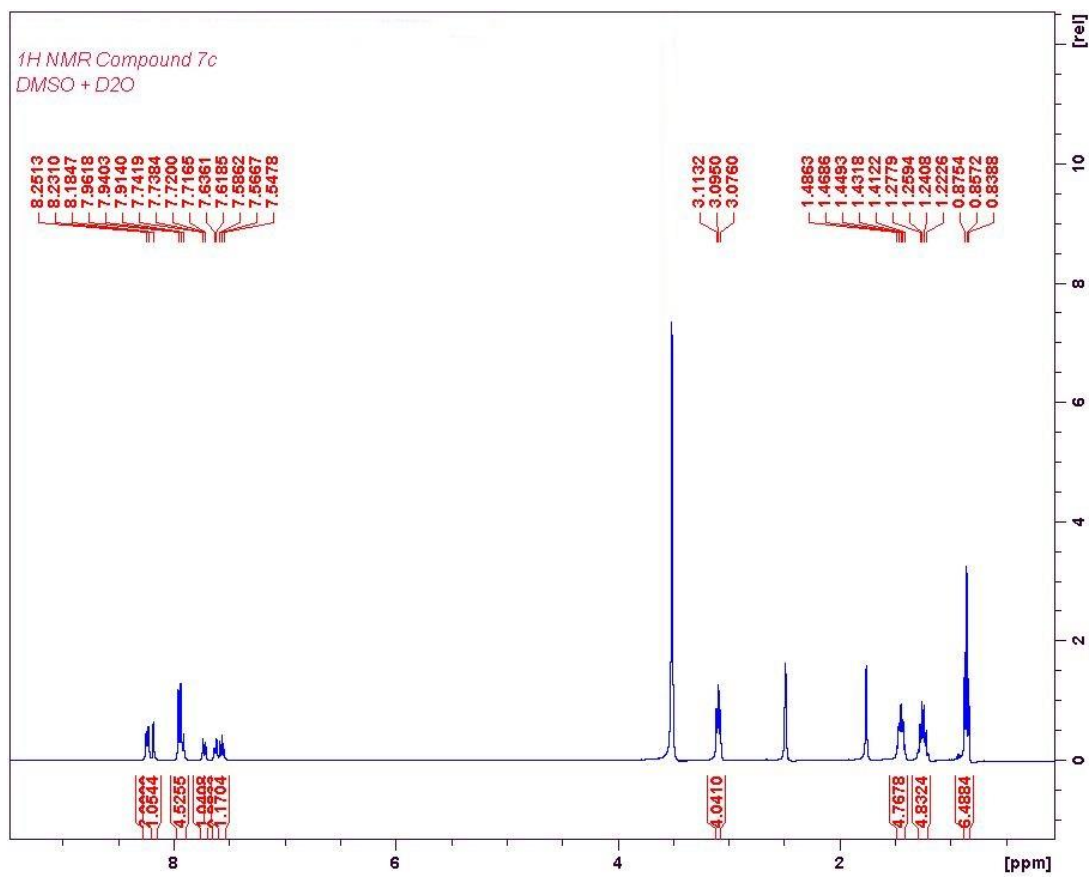



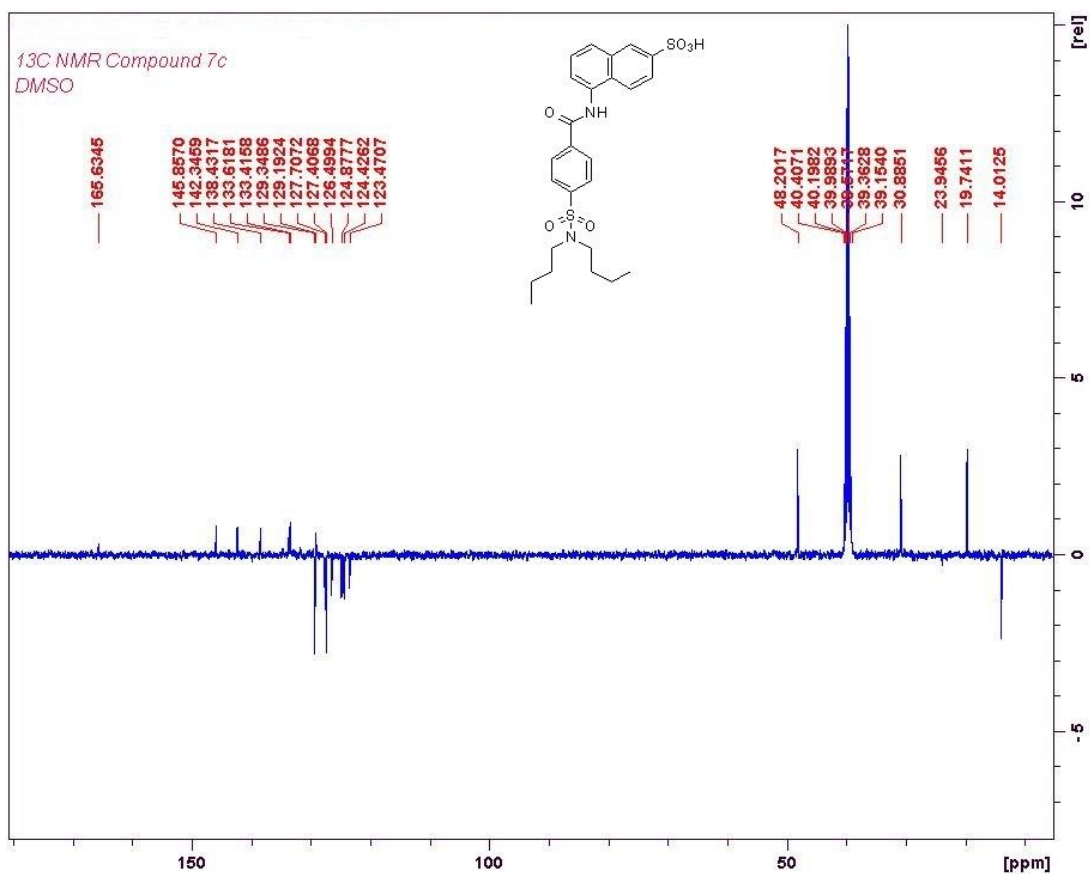

<sup>1</sup>H-NMR and <sup>13</sup>C-NMR spectra of compound **7d**

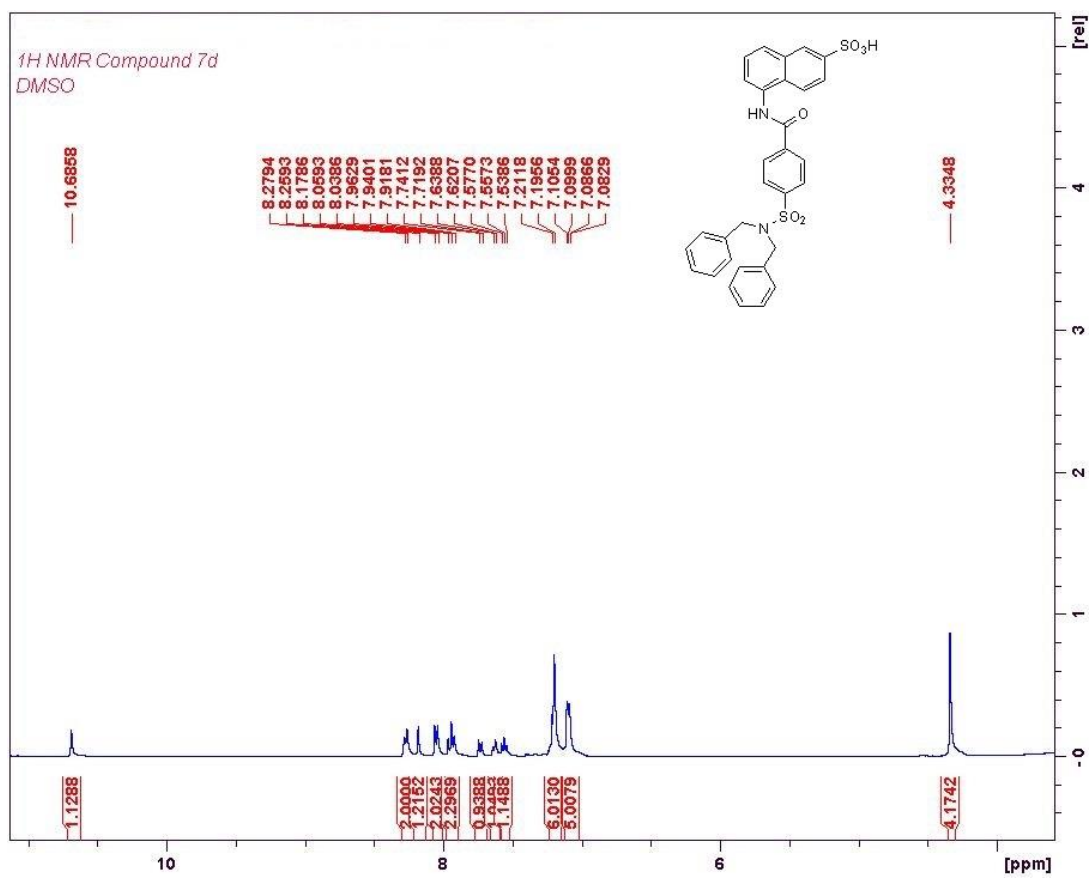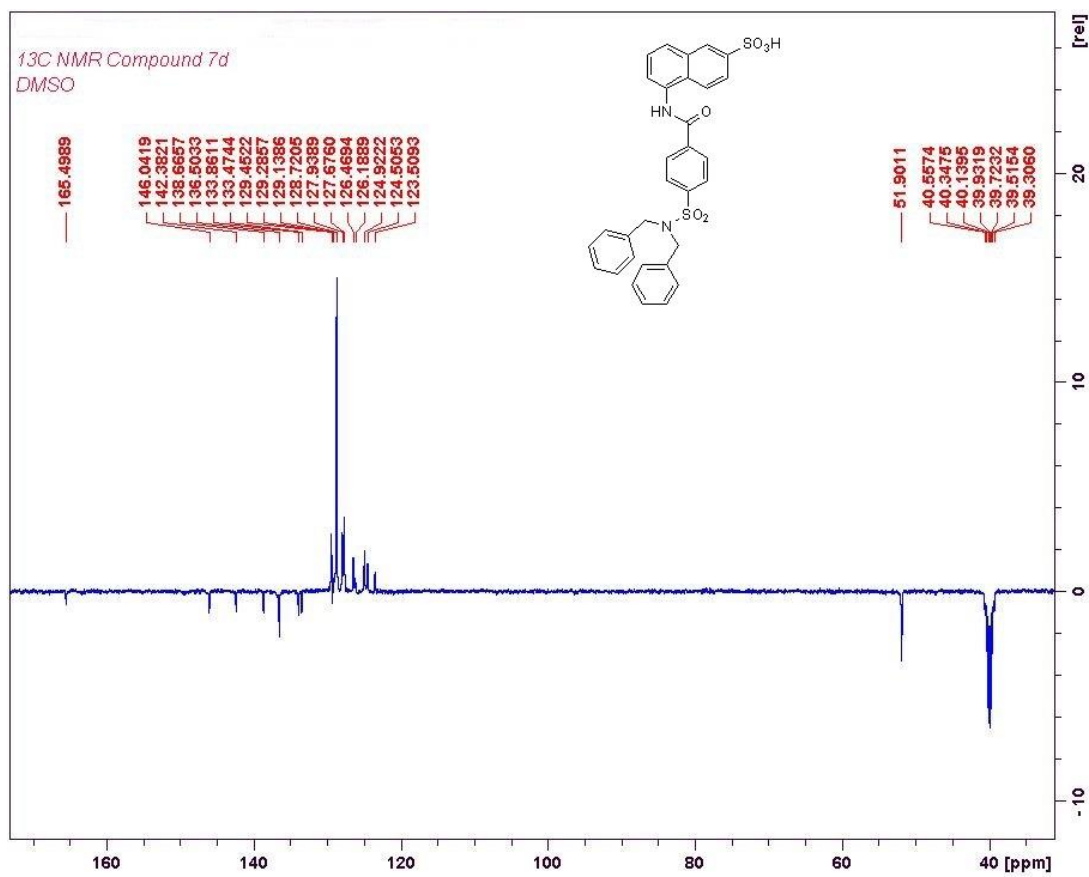

<sup>1</sup>H-NMR and <sup>13</sup>C-NMR spectra of compound **7e**

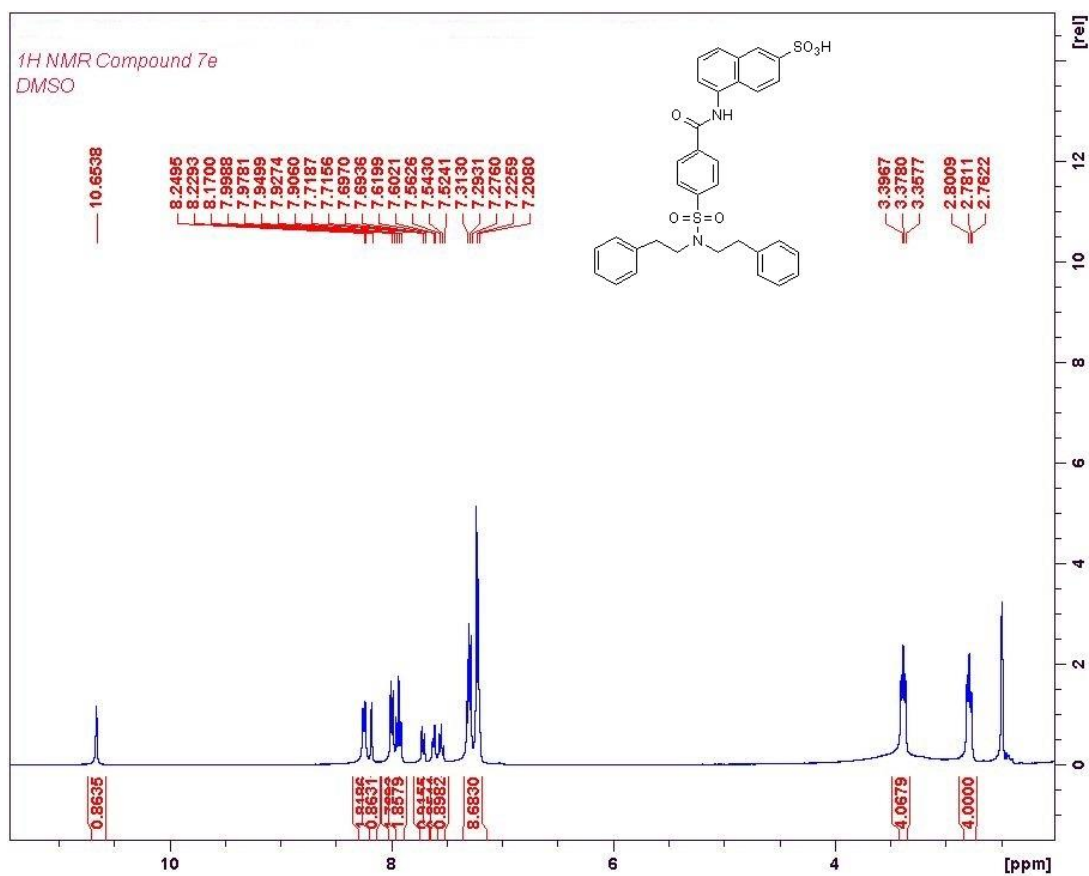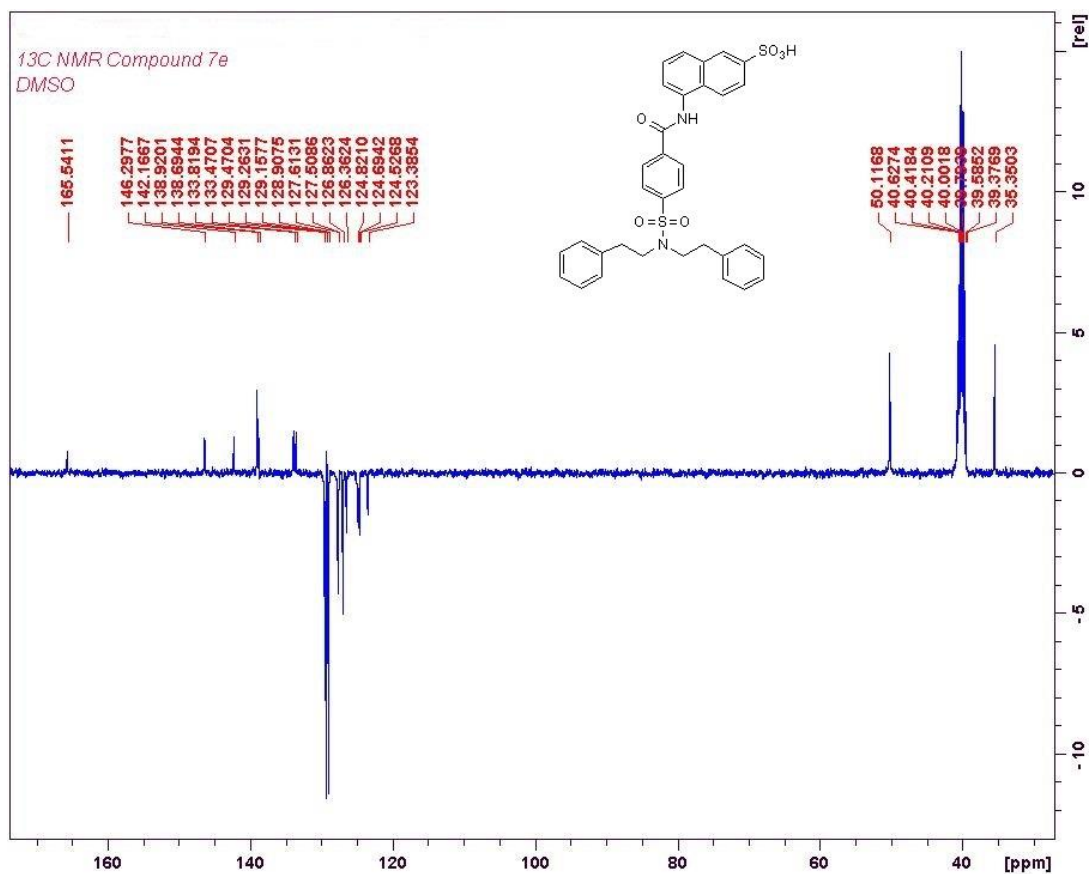

<sup>1</sup>H-NMR and <sup>13</sup>C-NMR spectra of compound **7f**

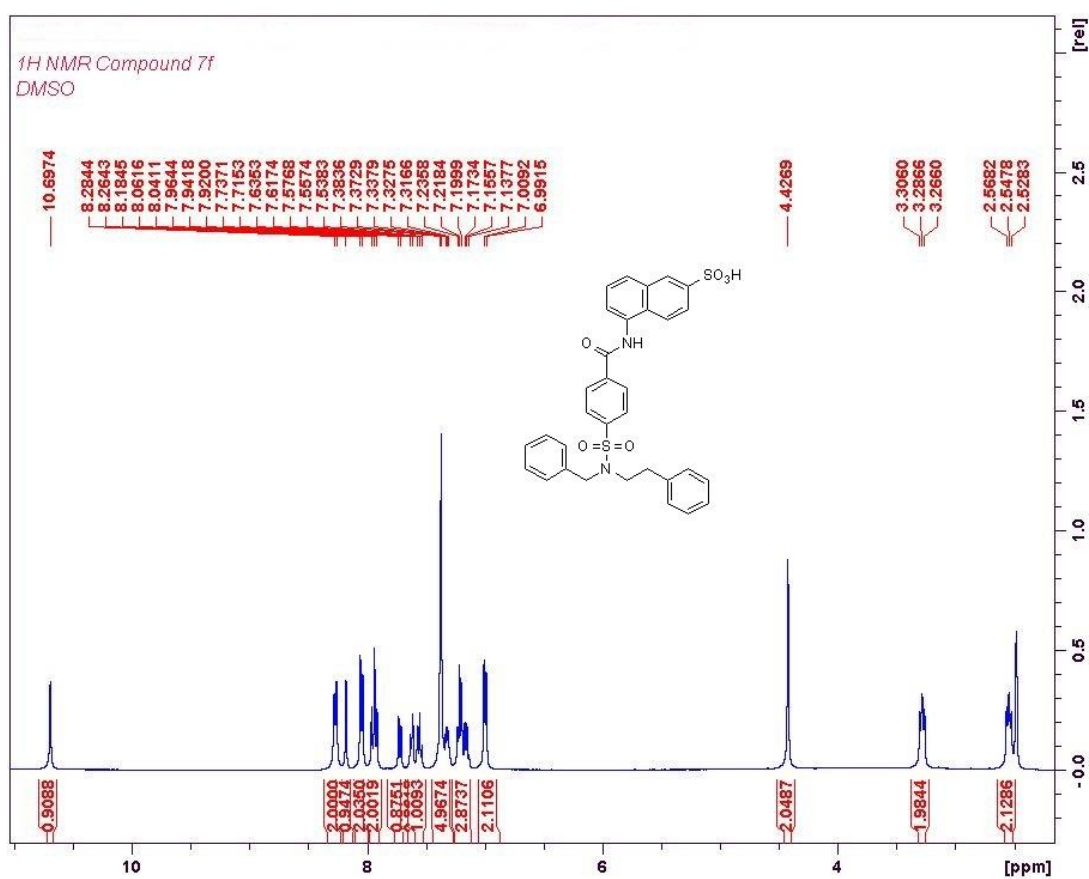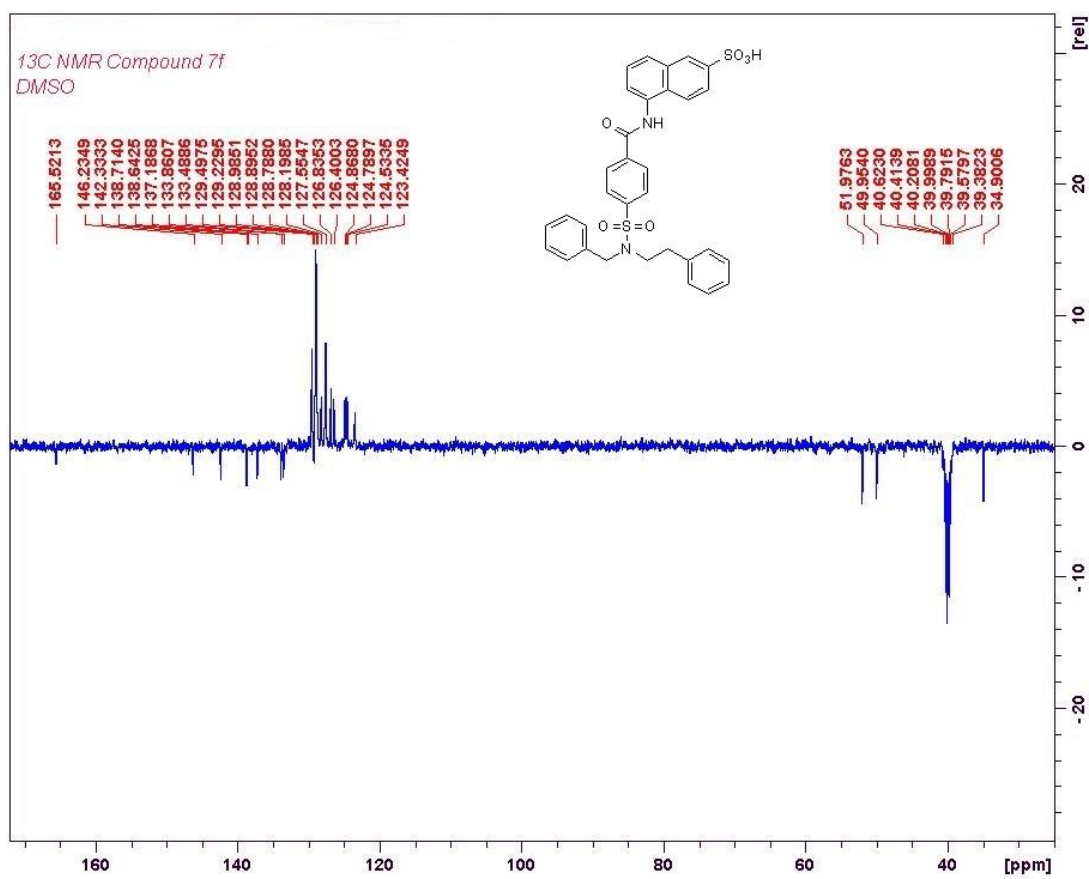

<sup>1</sup>H-NMR and <sup>13</sup>C-NMR spectra of compound **7g**

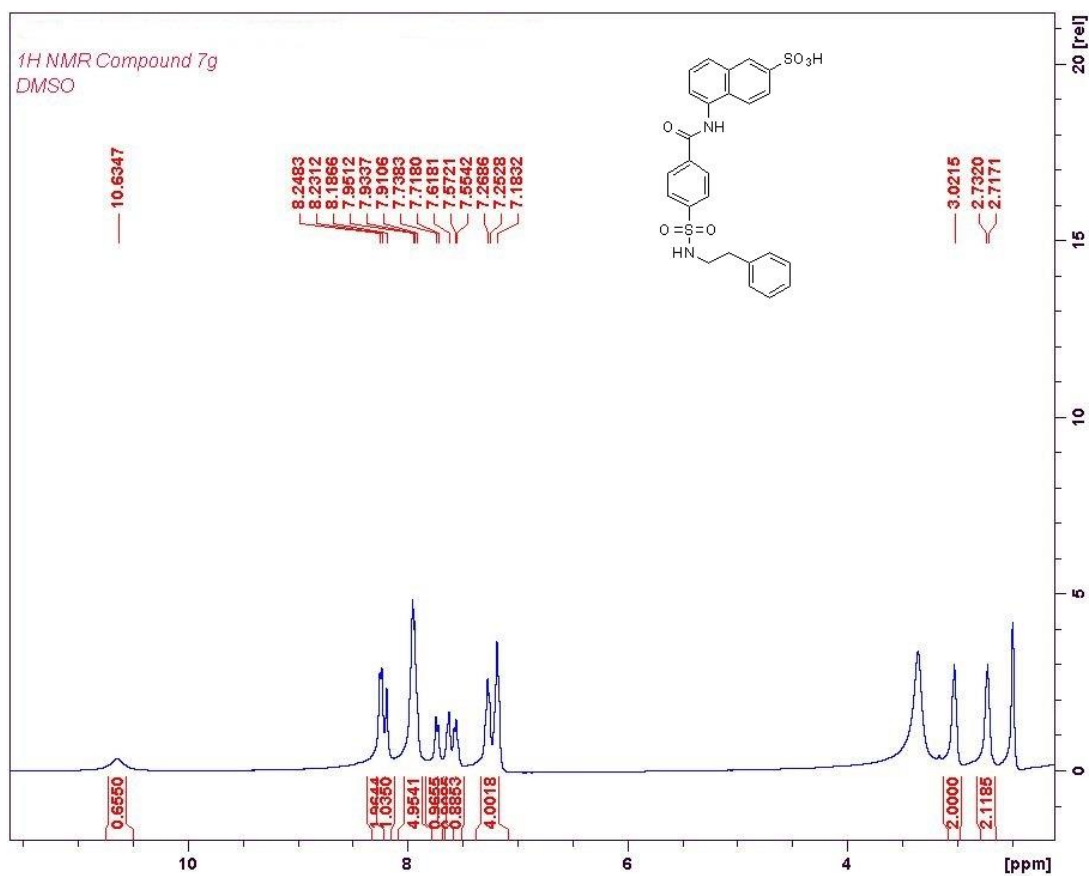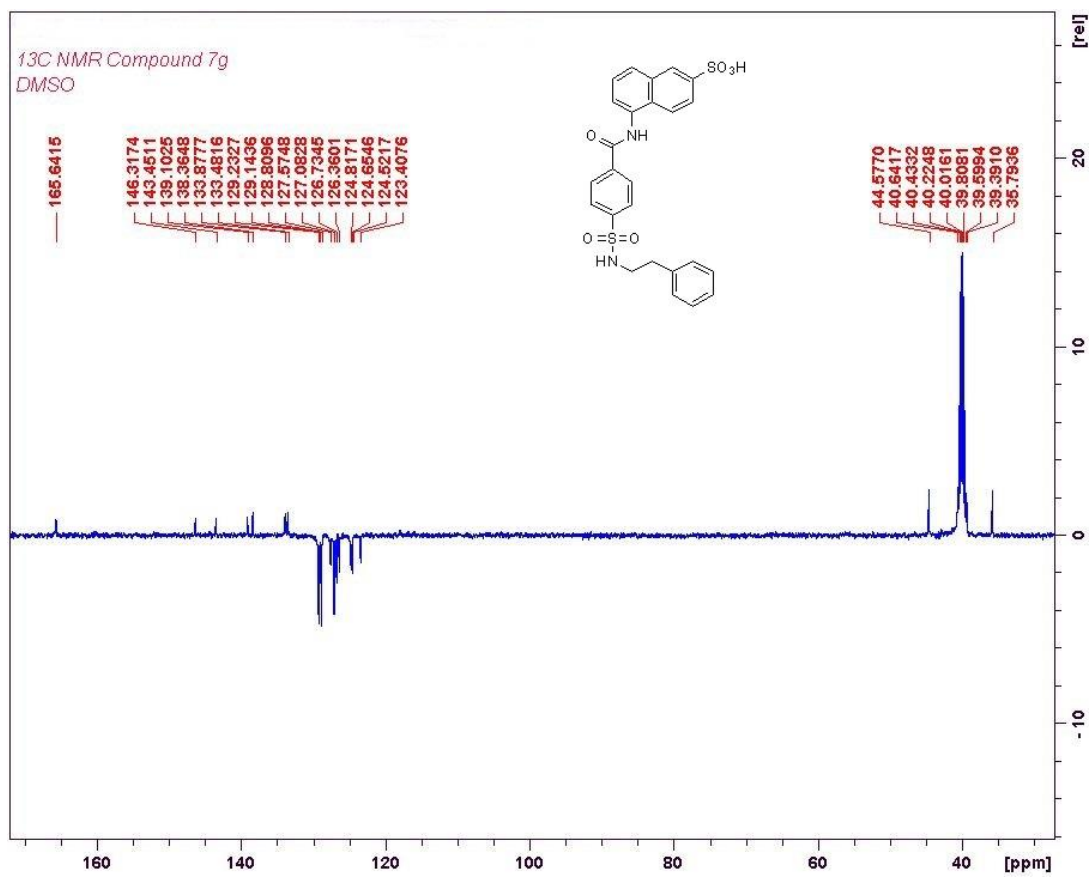

<sup>1</sup>H-NMR and <sup>13</sup>C-NMR spectra of compound **13**

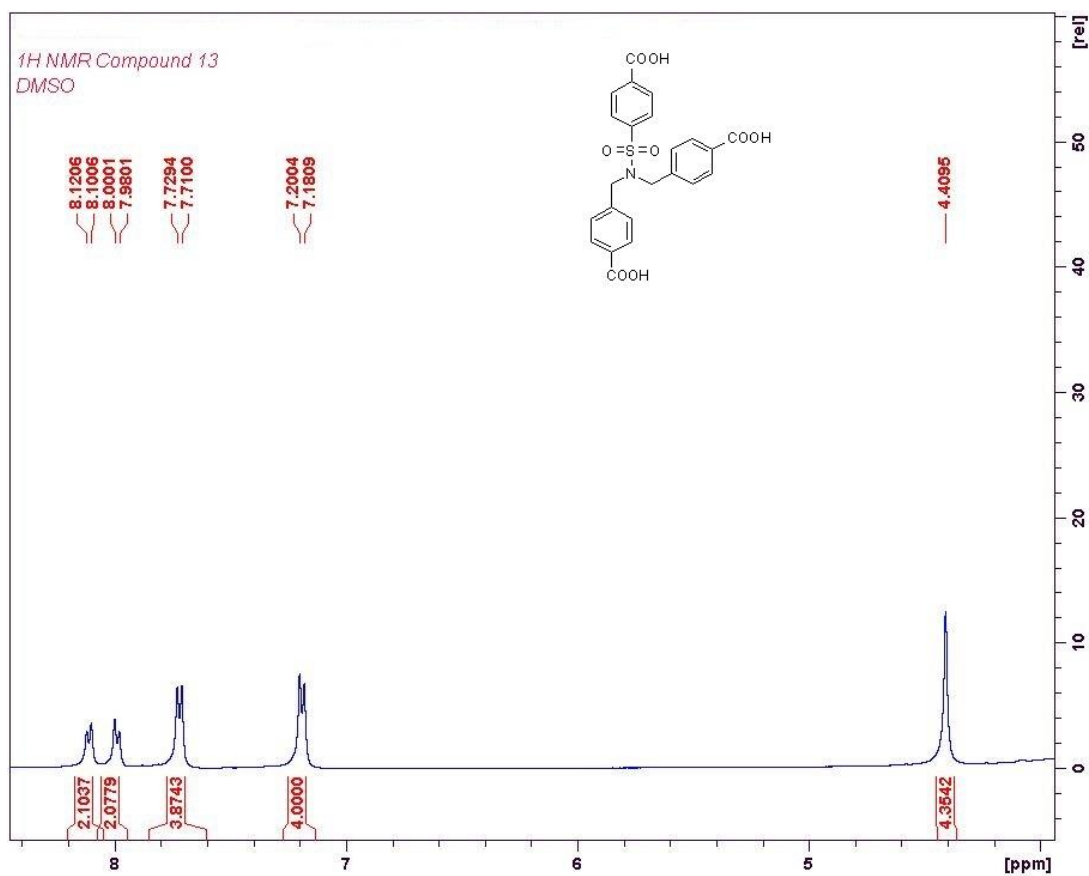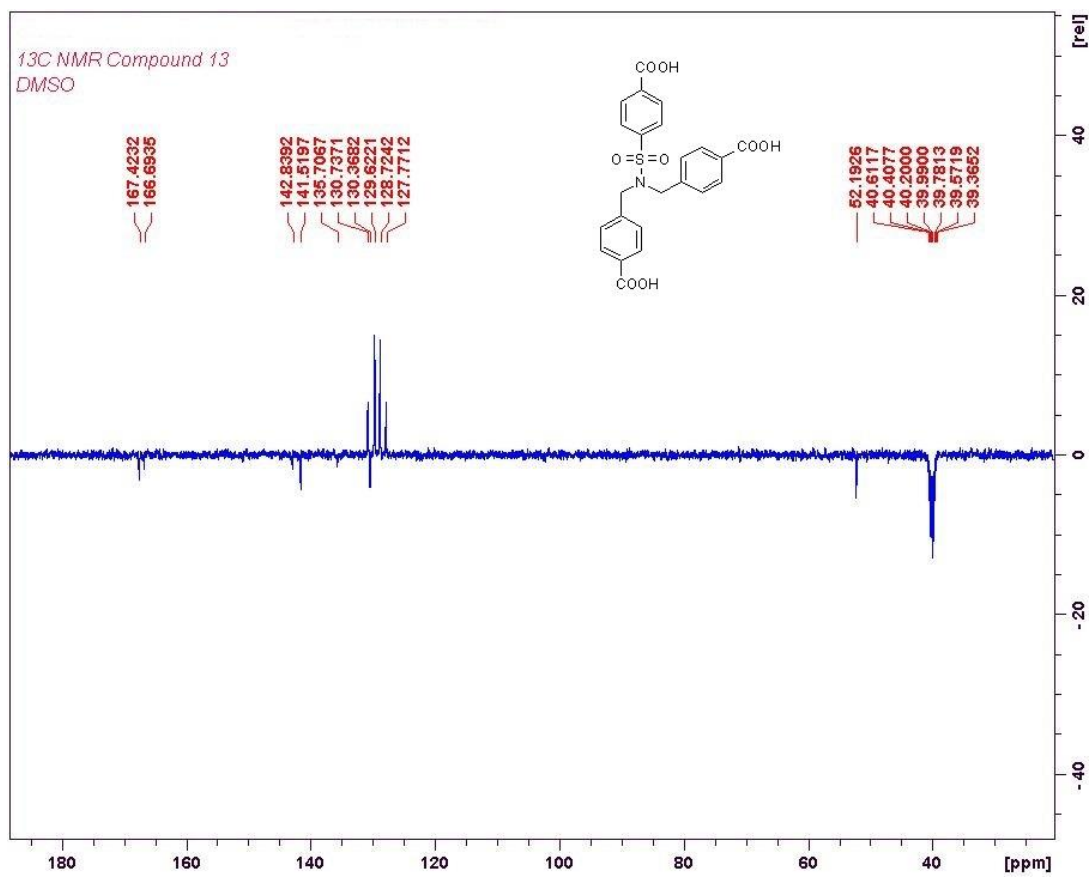

<sup>1</sup>H-NMR spectrum of intermediate **15b**

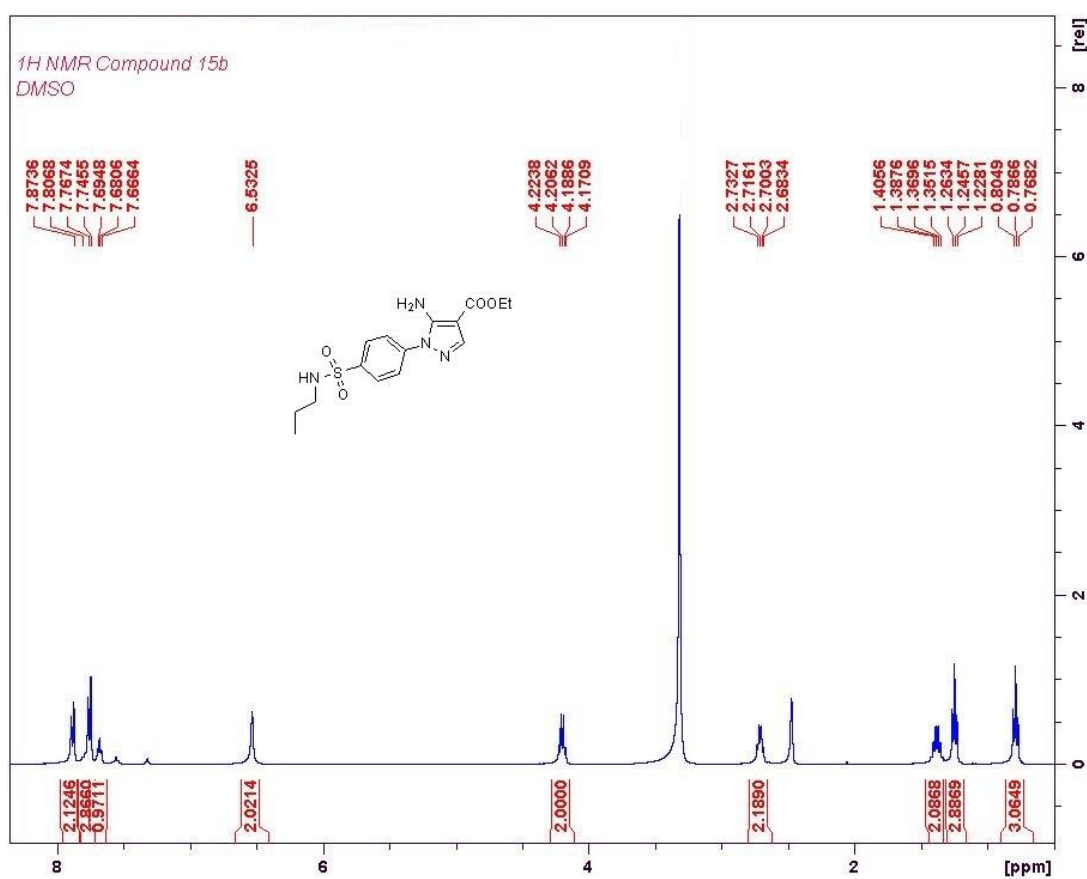

<sup>1</sup>H-NMR spectrum of intermediate **15c**

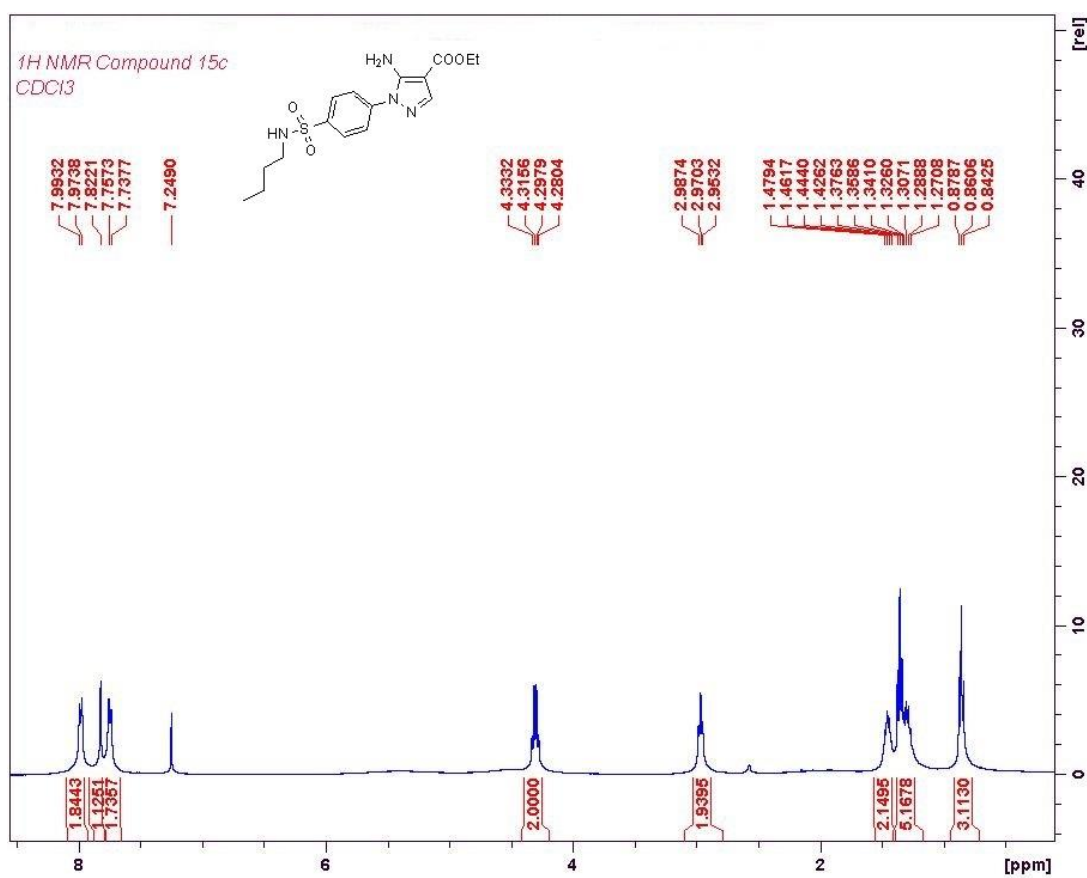



<sup>1</sup>H-NMR spectrum of intermediate **16b**

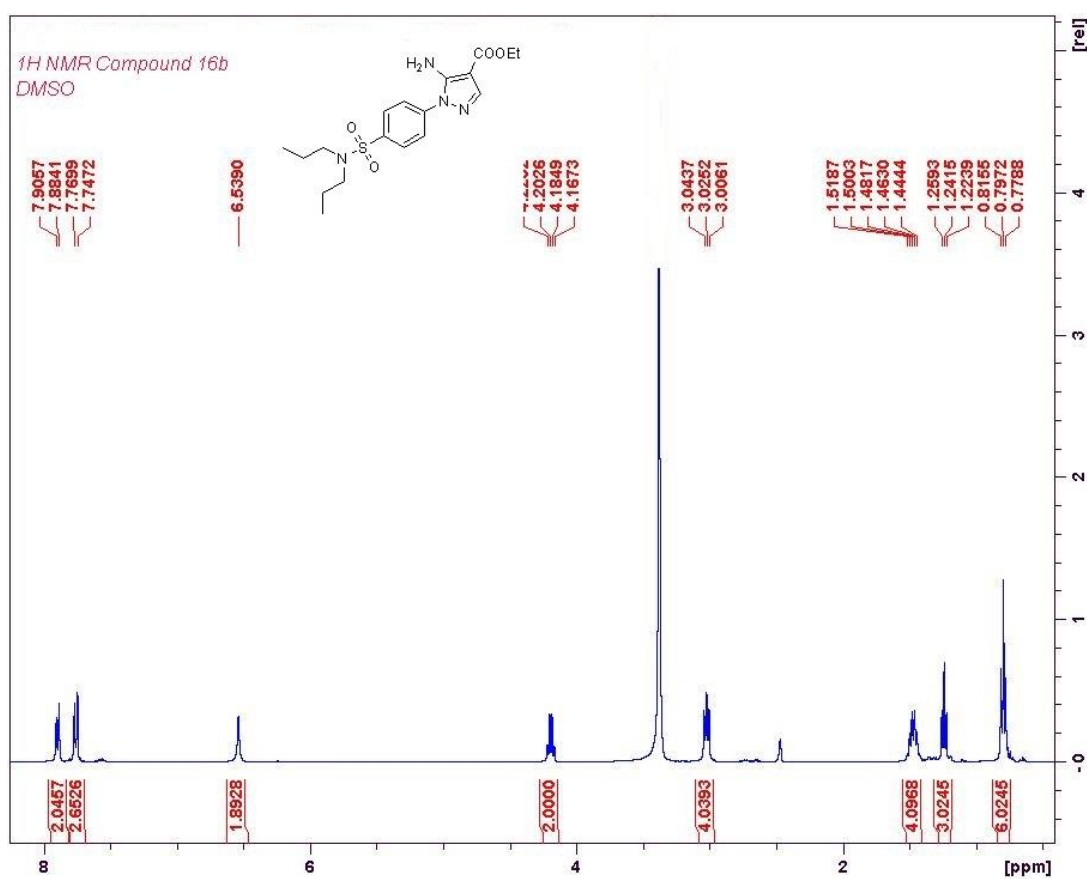

<sup>1</sup>H-NMR spectrum of intermediate **16c**

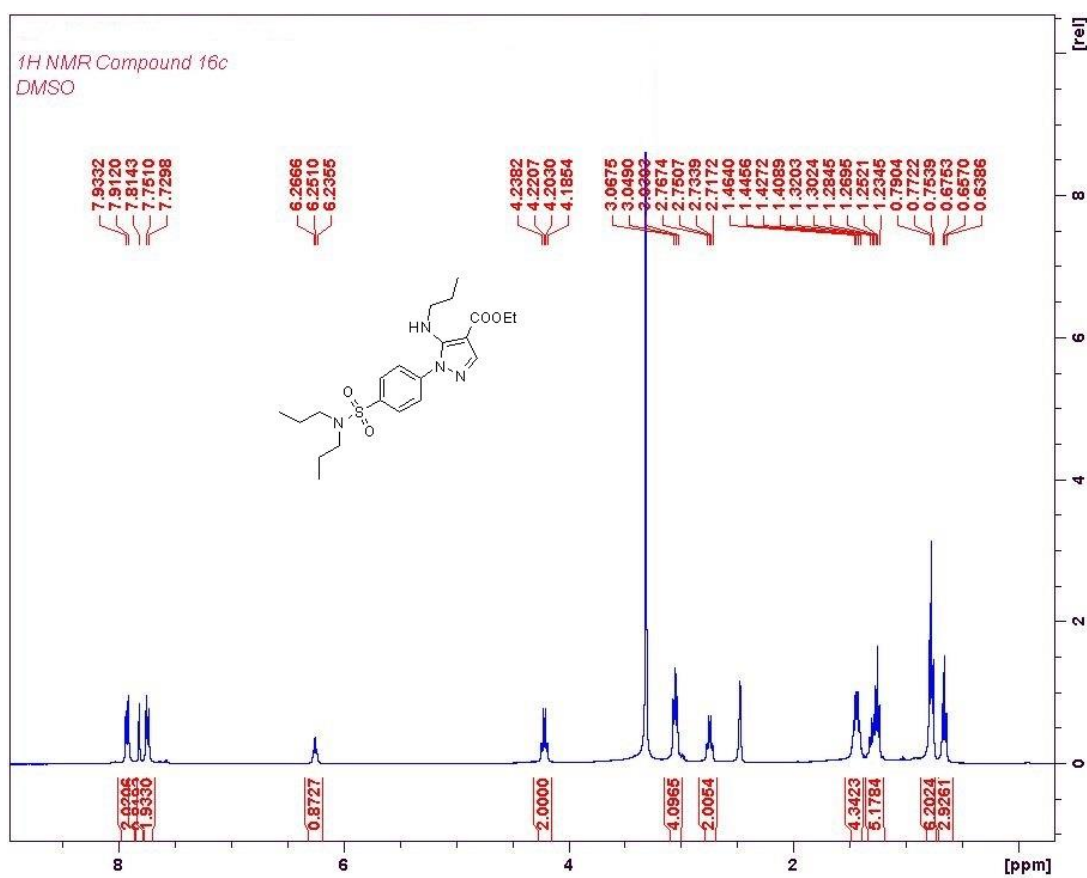



<sup>1</sup>H-NMR and <sup>13</sup>C-NMR spectra of compound **17**

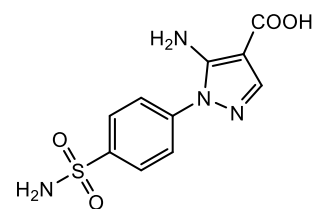

<sup>1</sup>H NMR Compound 17  
DMSO

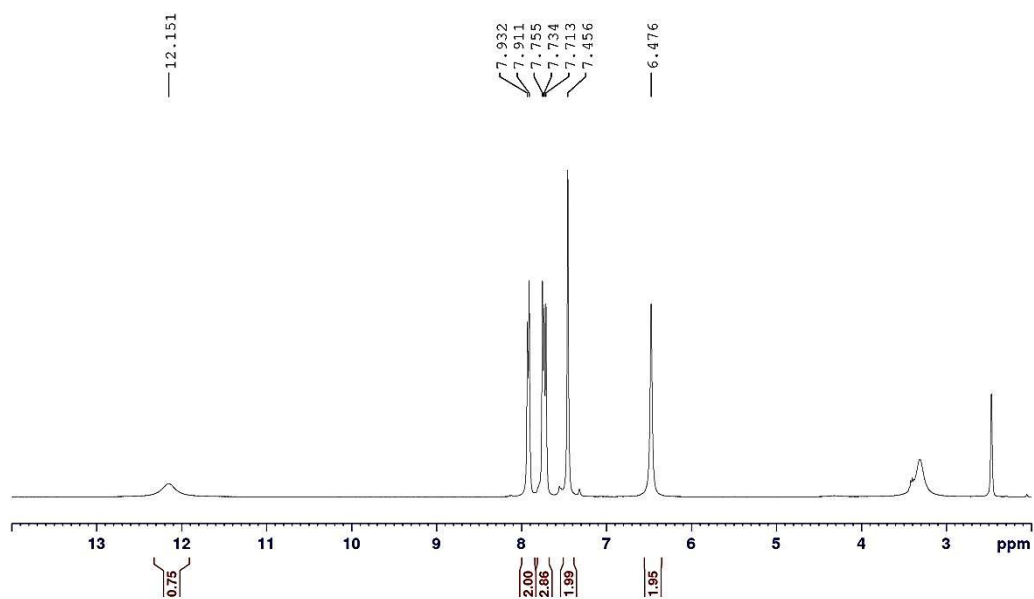

<sup>13</sup>C NMR Compound 17  
DMSO

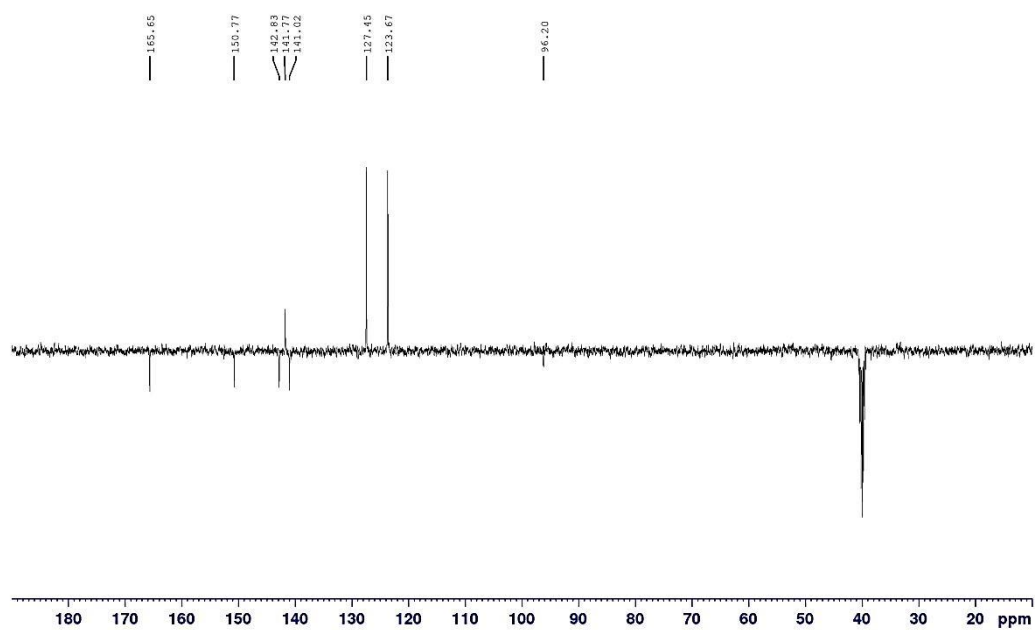

<sup>1</sup>H-NMR and <sup>13</sup>C-NMR spectra of compound **18c**

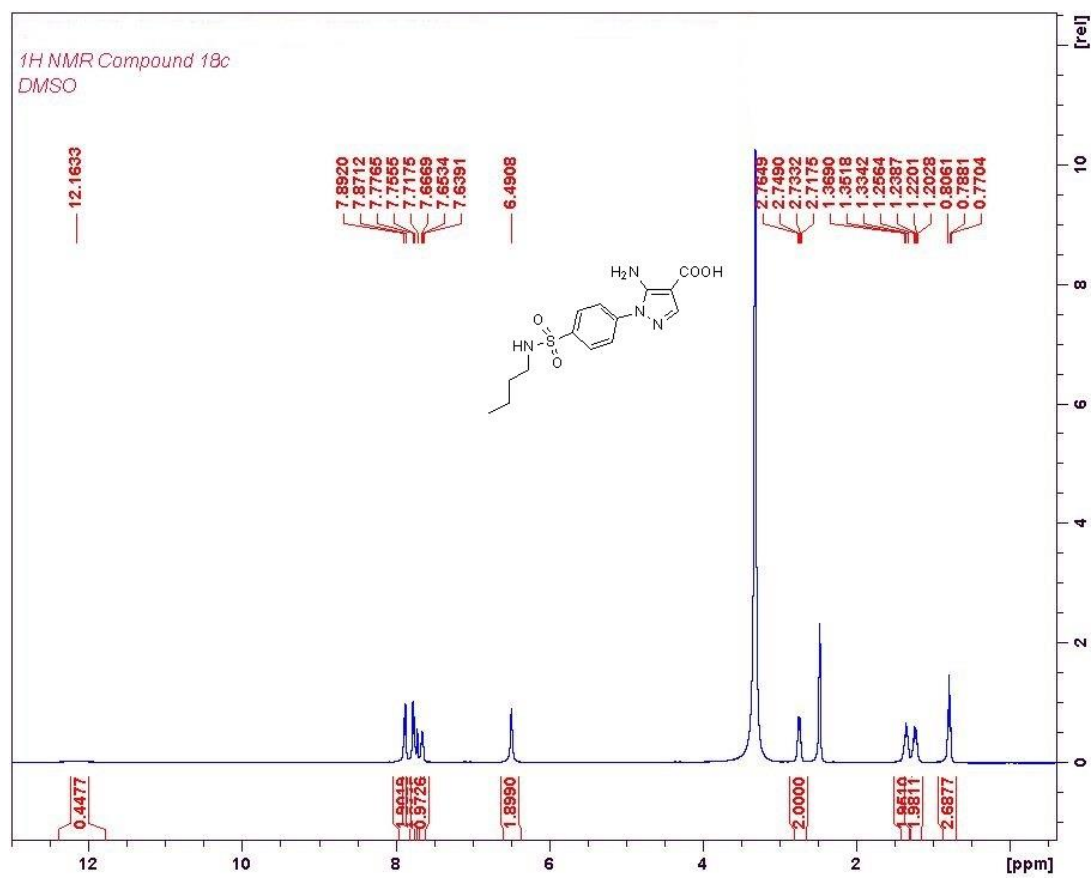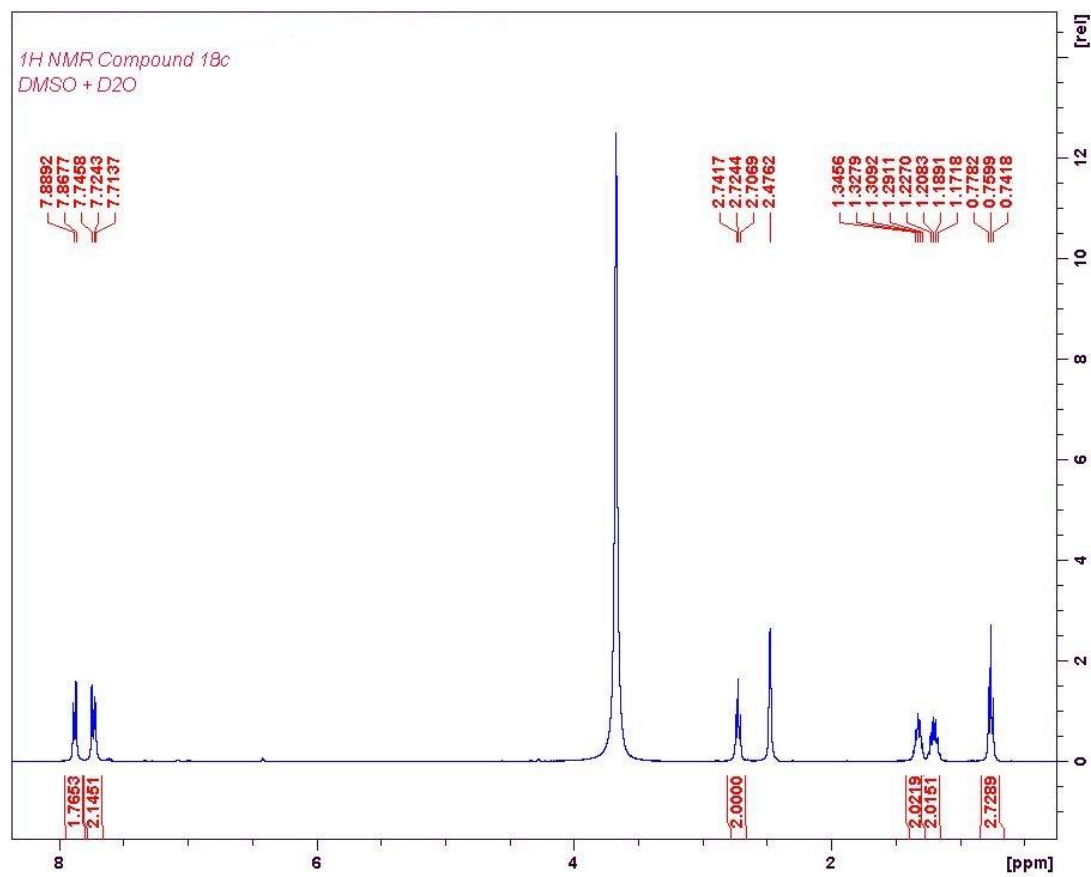

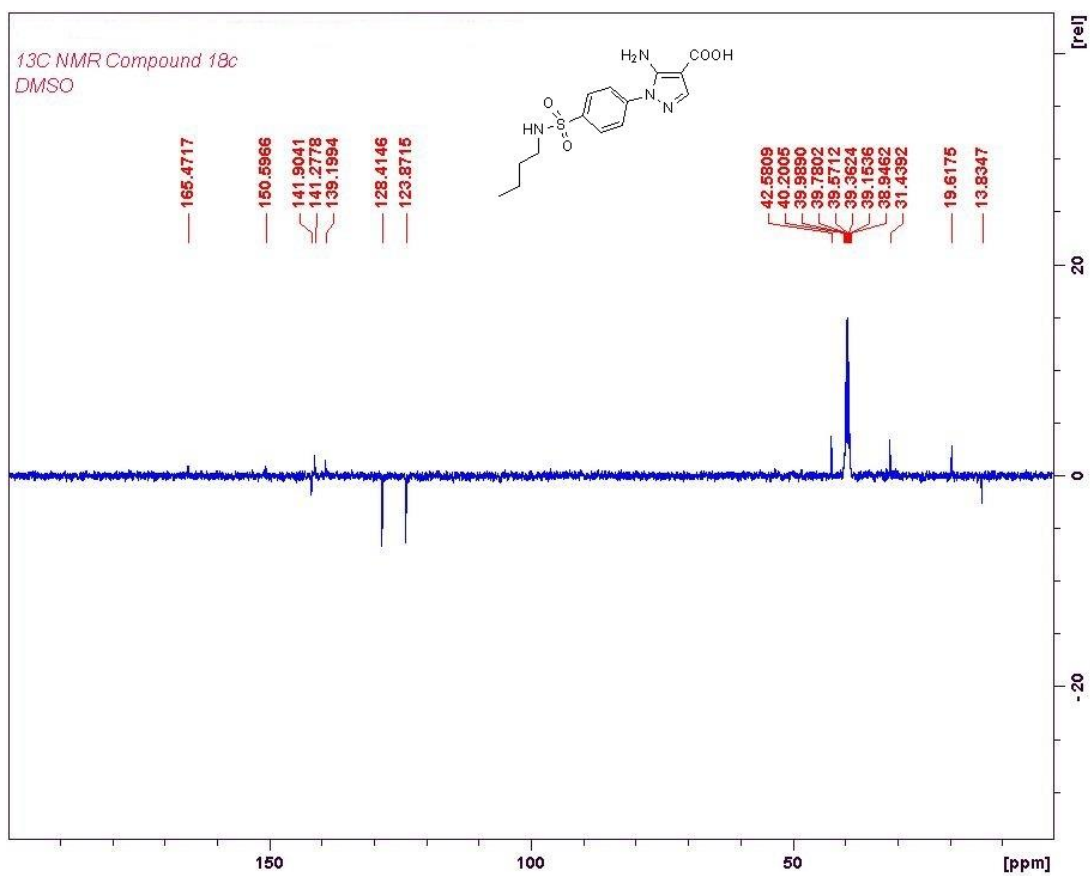

# <sup>1</sup>H-NMR and <sup>13</sup>C-NMR spectra of compound **19b**

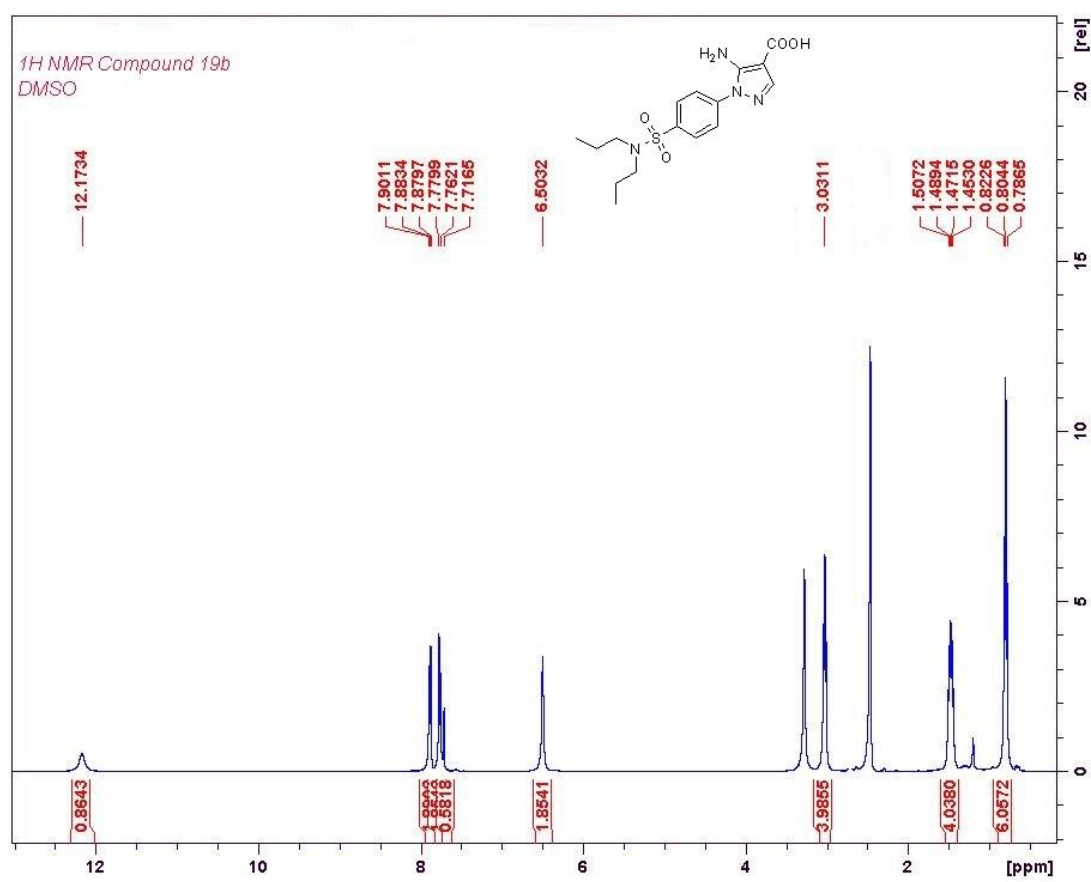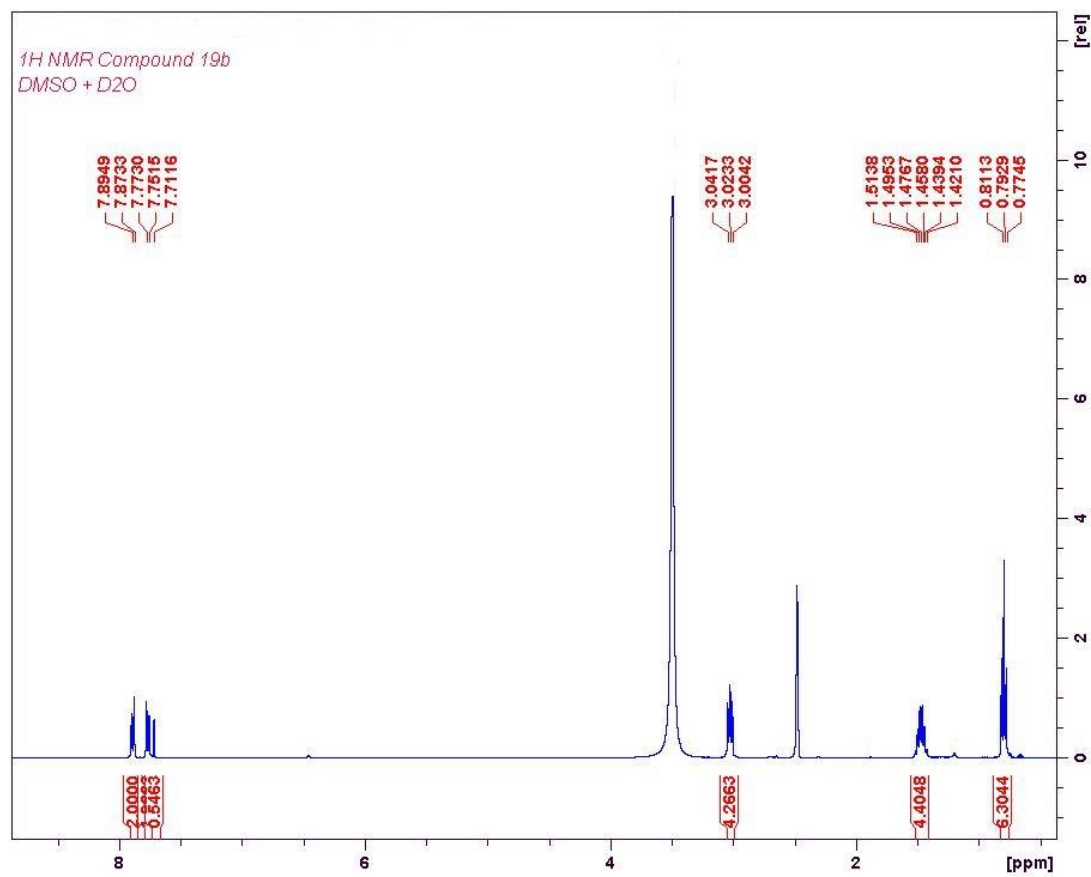

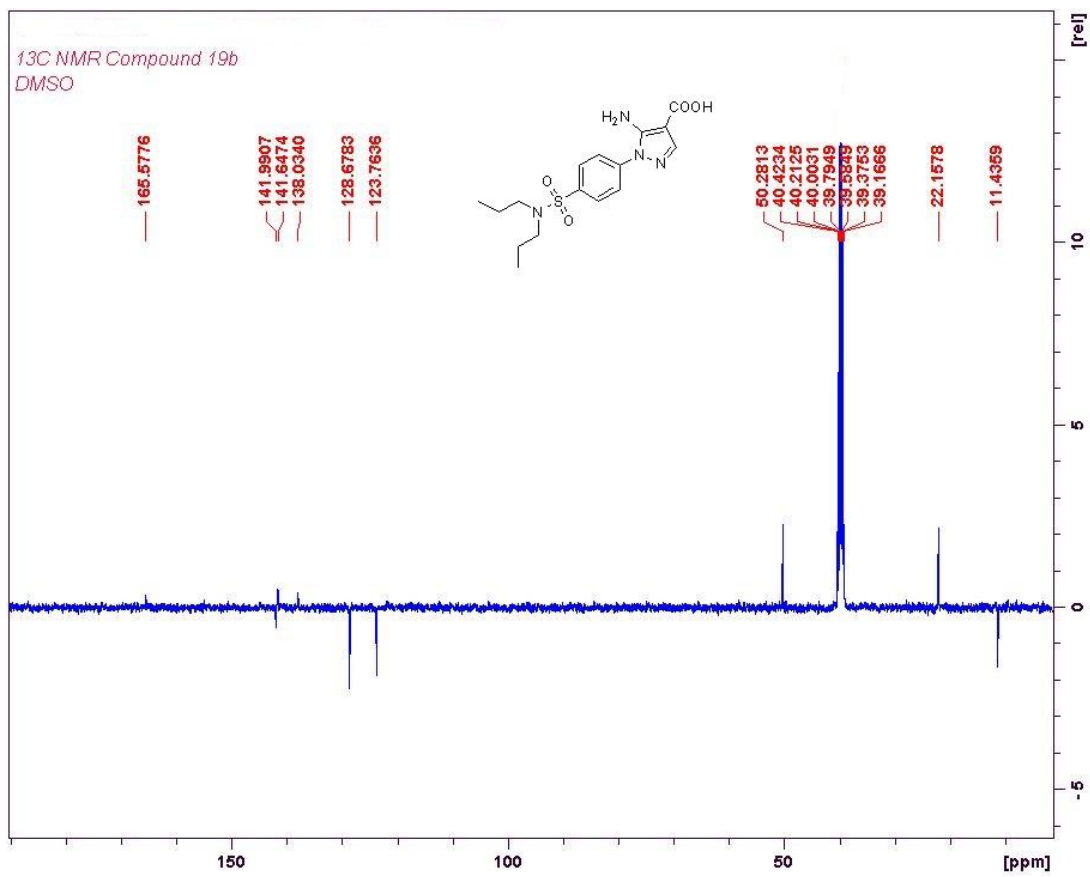

<sup>1</sup>H-NMR and <sup>13</sup>C-NMR spectra of compound **19c**

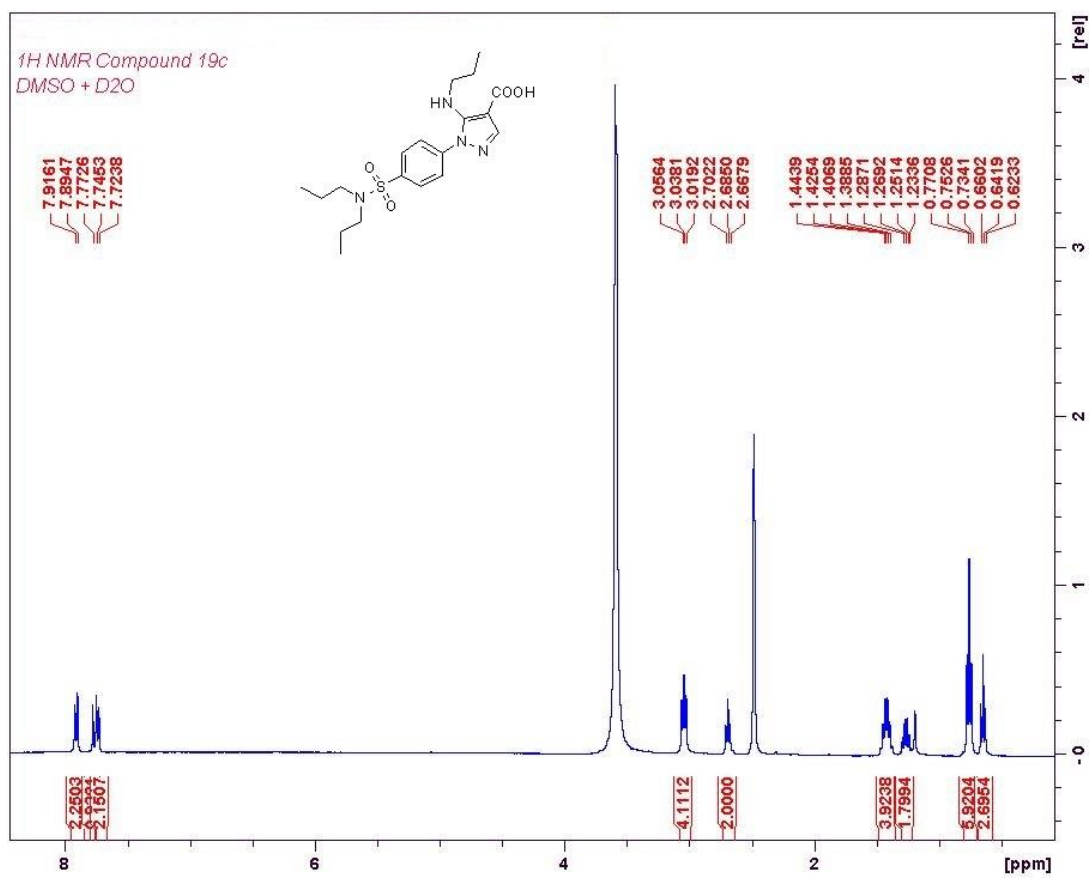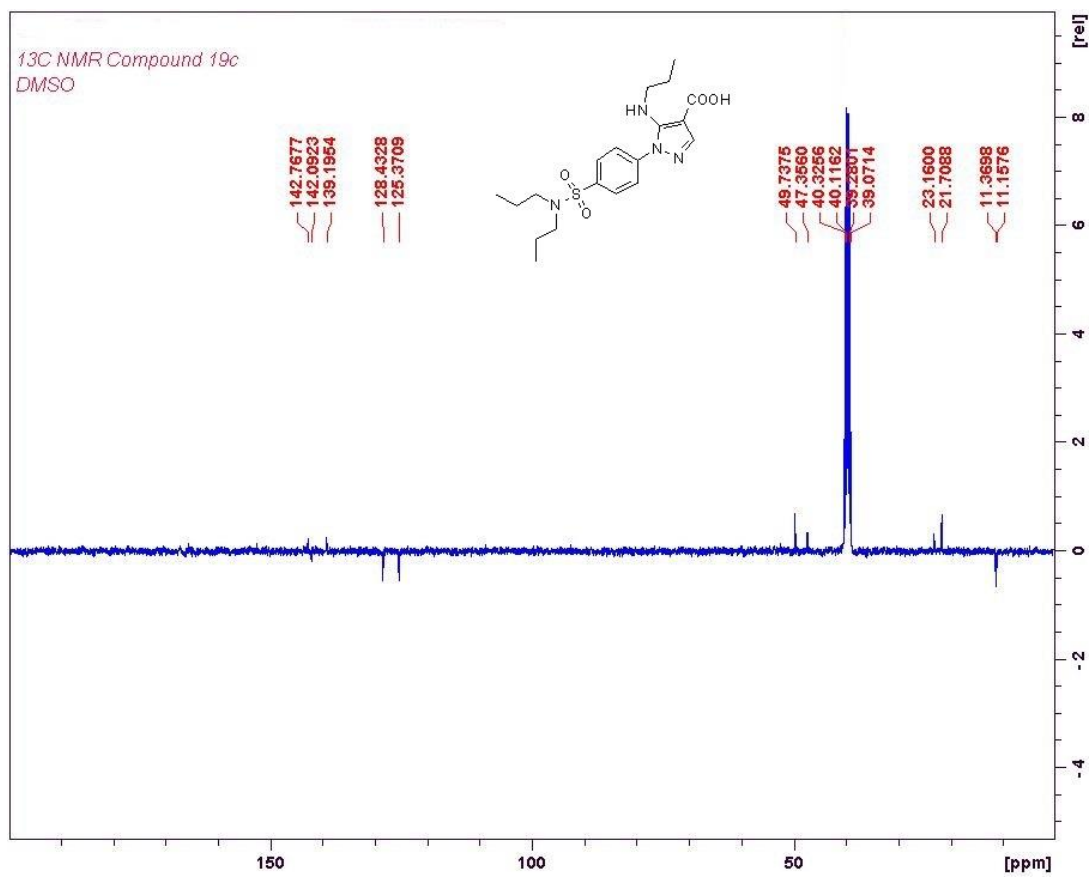

<sup>1</sup>H-NMR and <sup>13</sup>C-NMR spectra of compound **24**

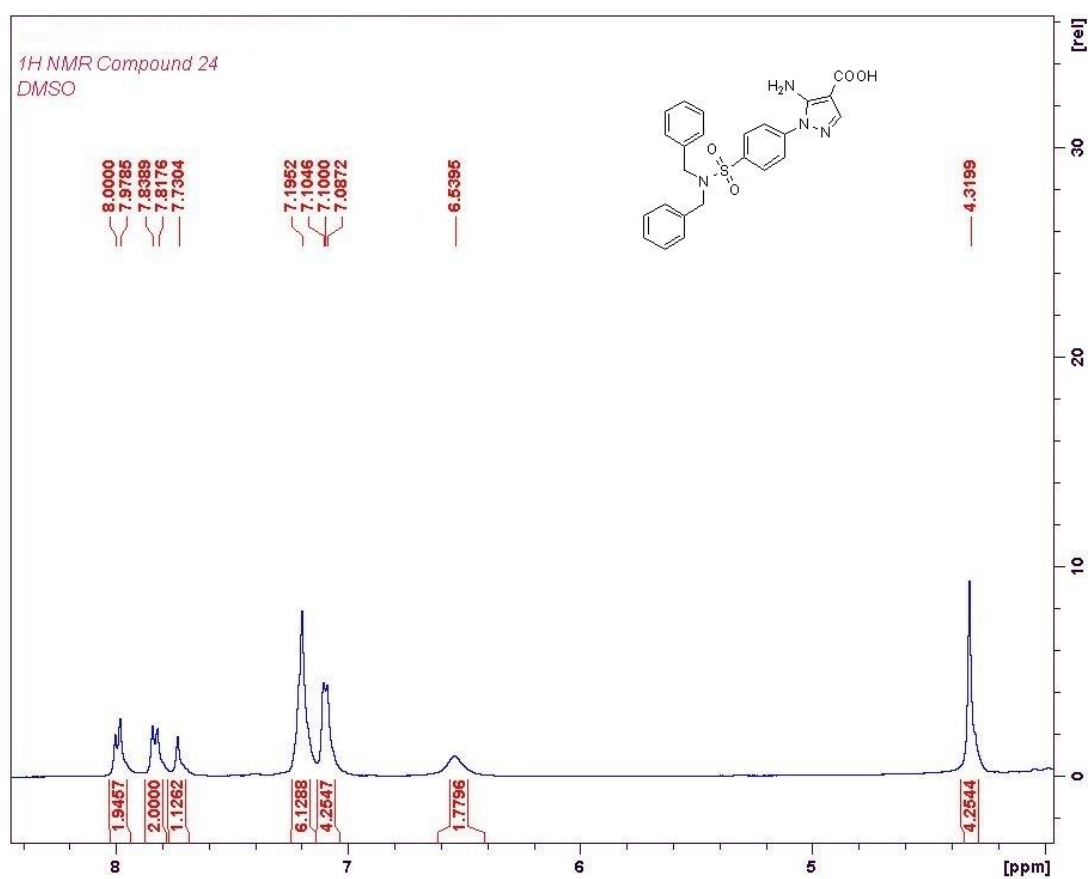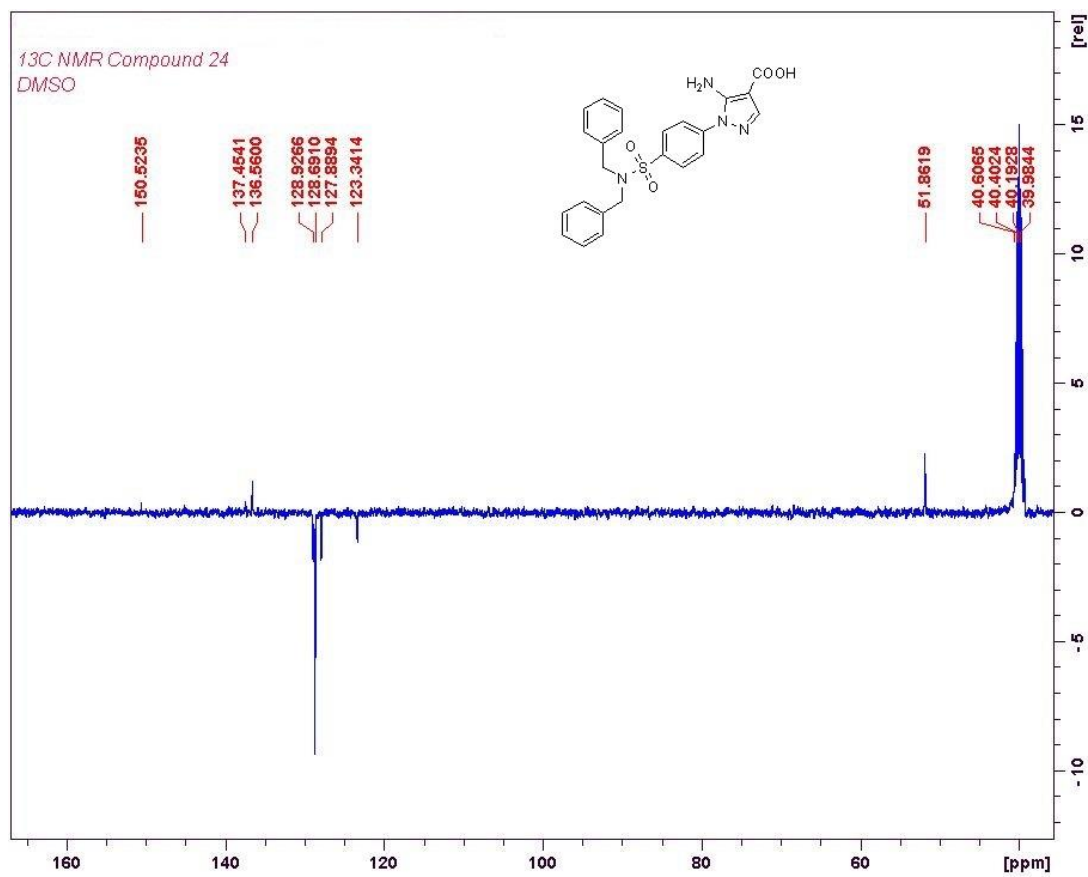

<sup>1</sup>H-NMR spectrum of intermediate **25**

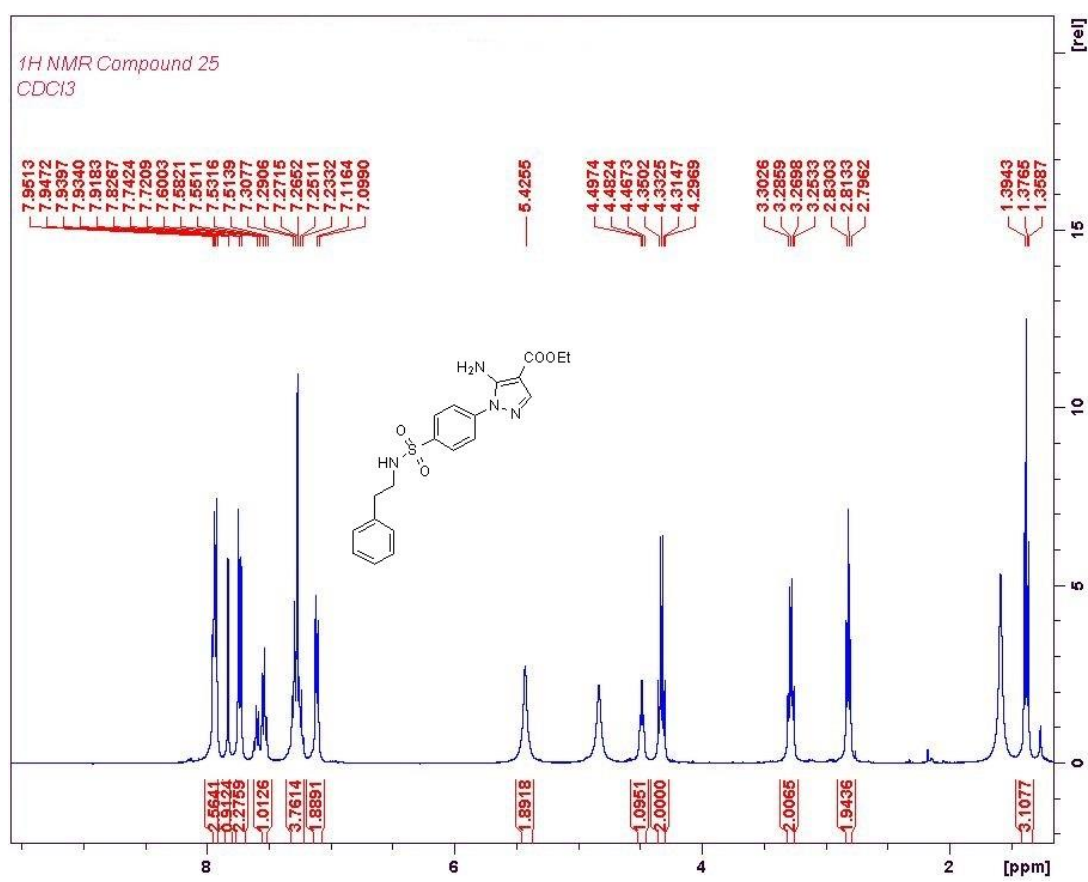



<sup>1</sup>H-NMR and <sup>13</sup>C-NMR spectra of compound **28**

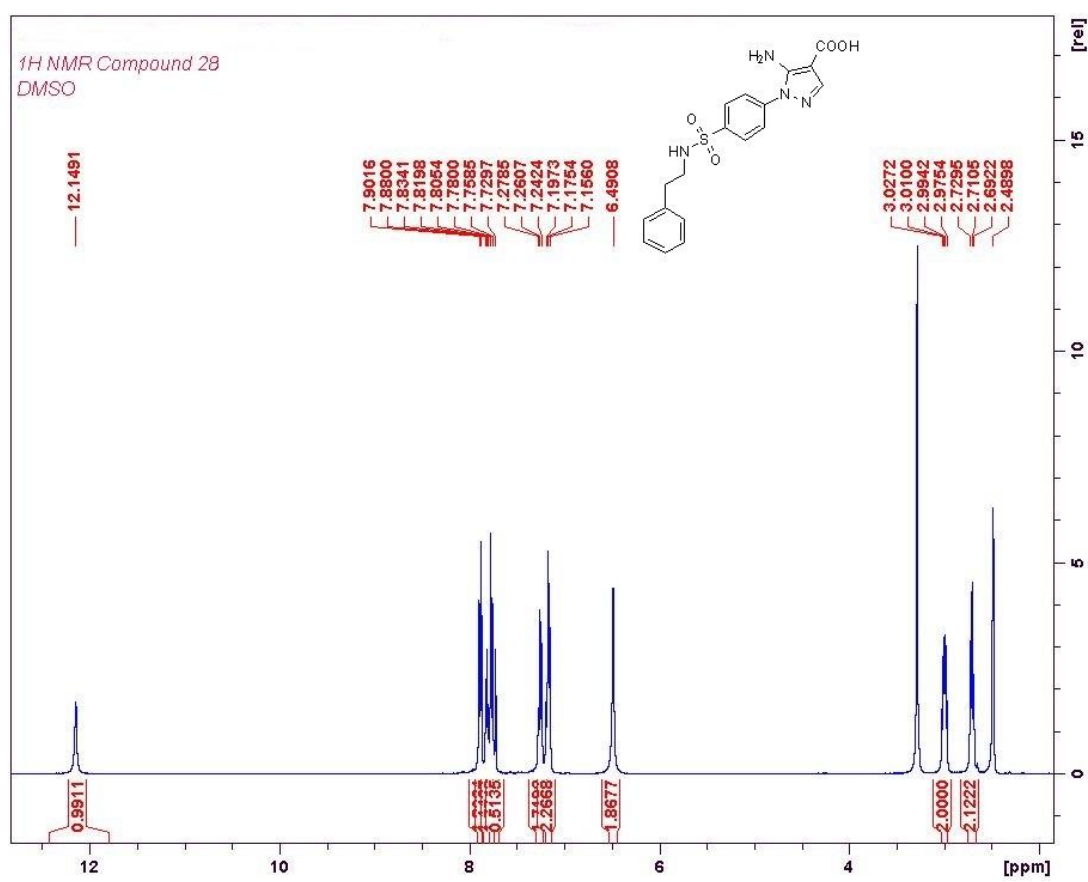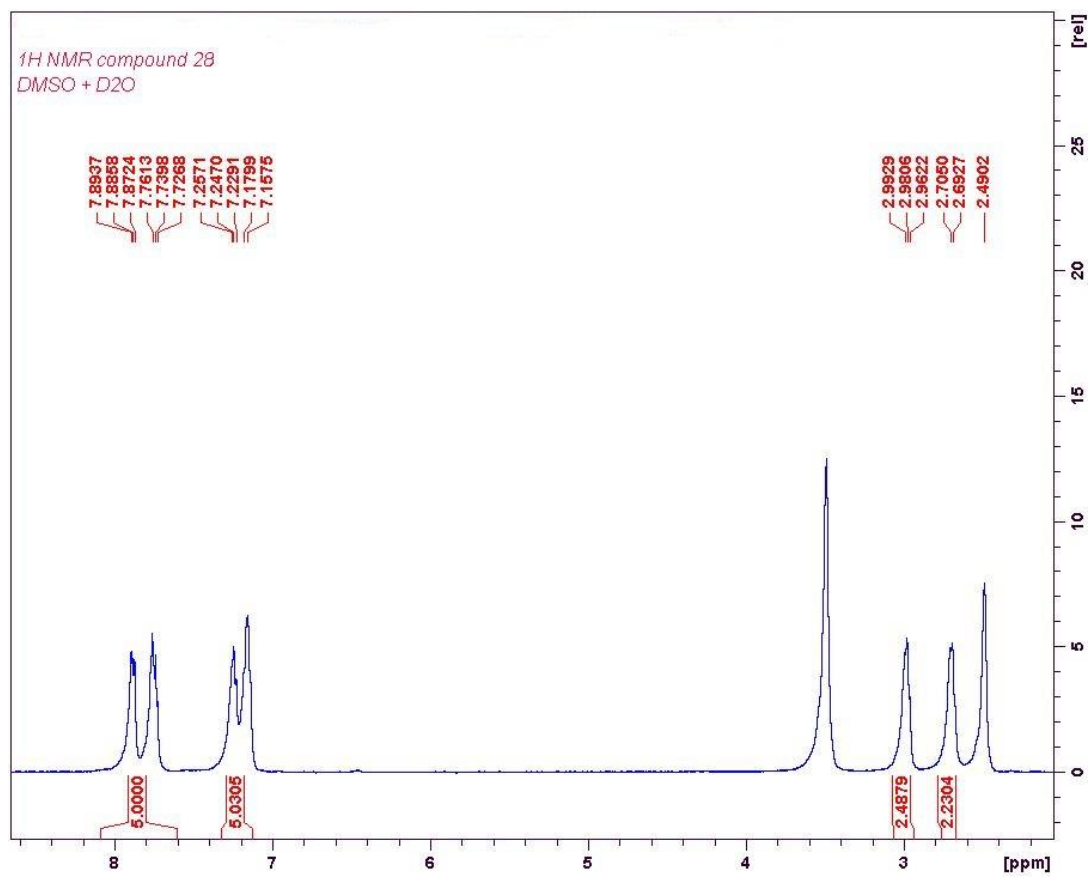

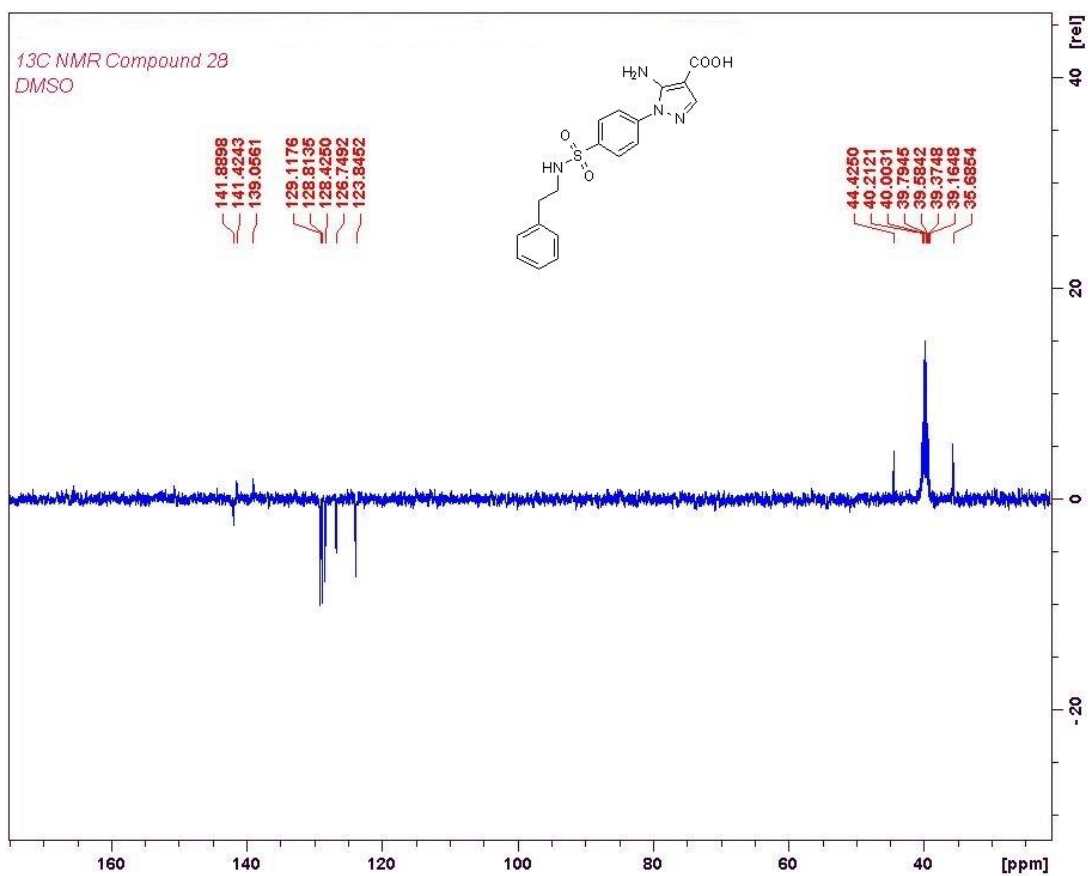

<sup>1</sup>H-NMR and <sup>13</sup>C-NMR spectra of compound **30**

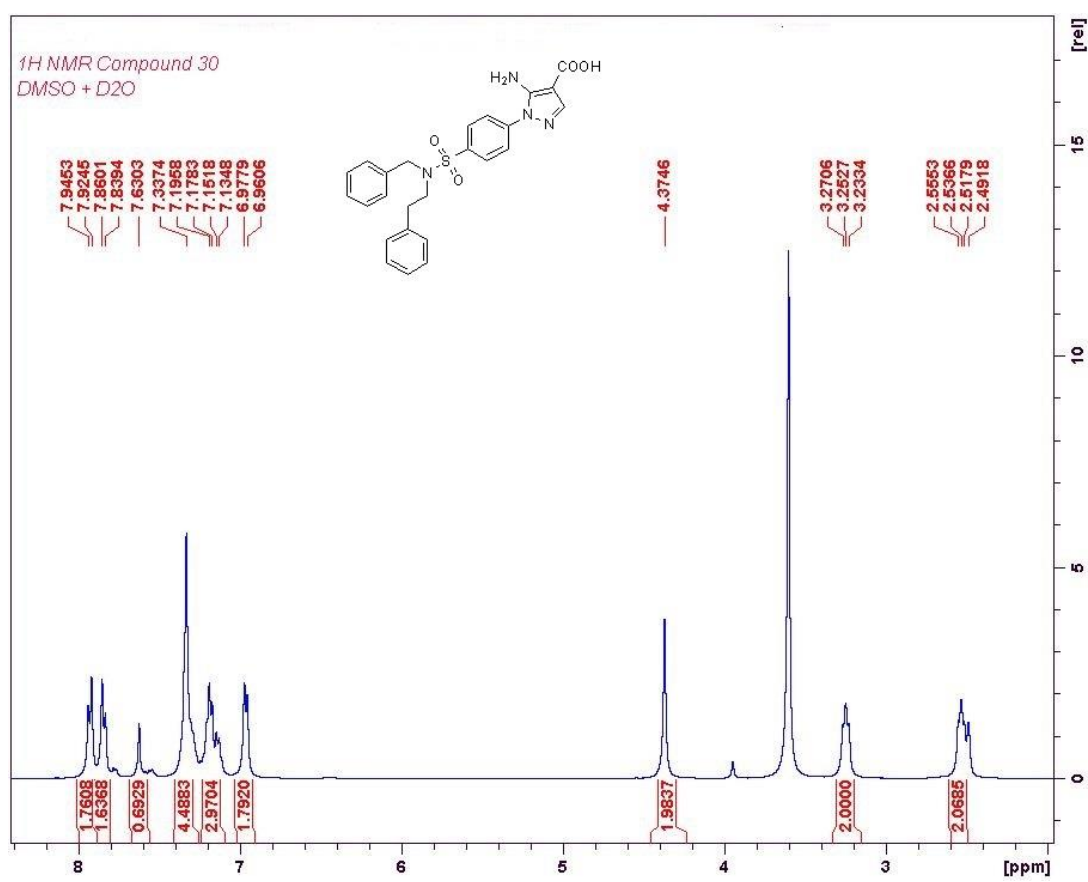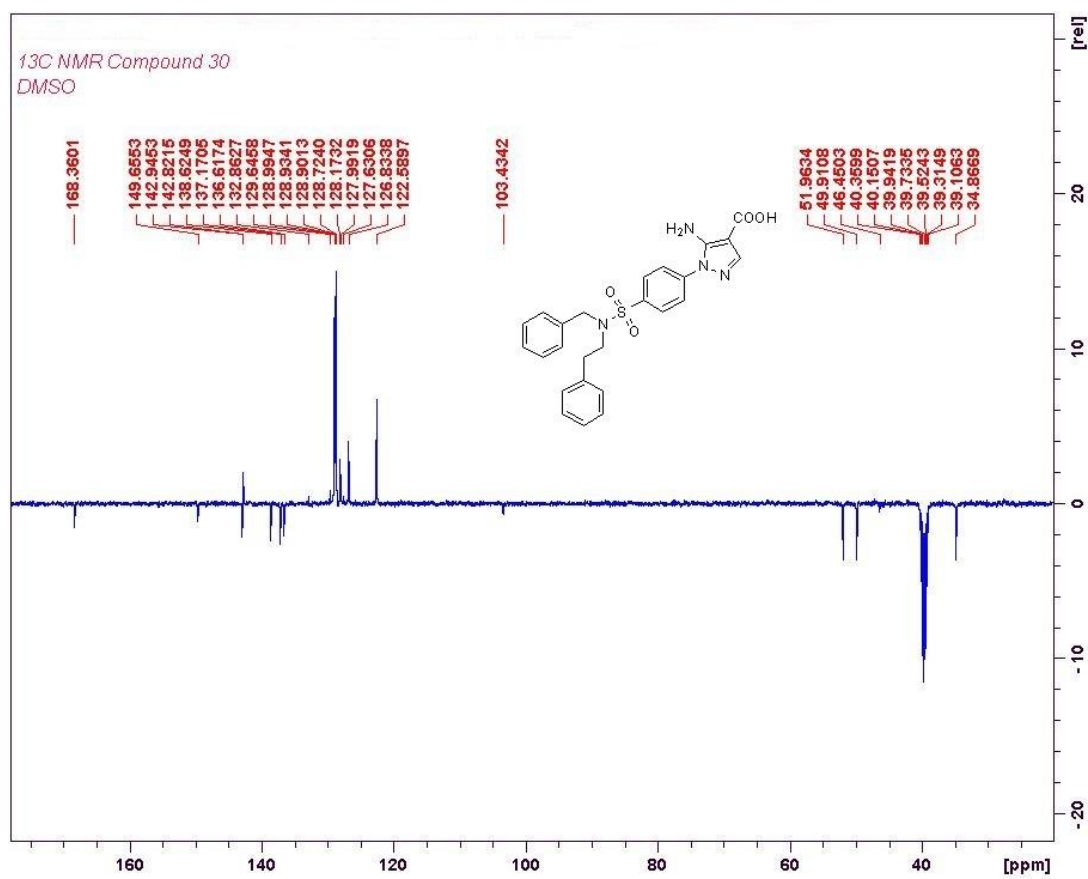

Table S1. Elemental analysis

| Comp.      | Formula (MW)                                                                            | Anal. Calcd. |      |       |  | Anal. Found |      |       |
|------------|-----------------------------------------------------------------------------------------|--------------|------|-------|--|-------------|------|-------|
|            |                                                                                         | C            | H    | N     |  | C           | H    | N     |
| <b>3a</b>  | C <sub>17</sub> H <sub>15</sub> NO <sub>3</sub> S (313.37)                              | 65.16        | 4.82 | 4.47  |  | 65.42       | 4.84 | 4.49  |
| <b>3b</b>  | C <sub>18</sub> H <sub>17</sub> NO <sub>3</sub> S (327.40)                              | 66.04        | 5.23 | 4.28  |  | 66.30       | 5.25 | 4.30  |
| <b>3c</b>  | C <sub>19</sub> H <sub>19</sub> NO <sub>3</sub> S (341.43)                              | 66.84        | 5.61 | 4.10  |  | 66.57       | 5.59 | 4.08  |
| <b>3d</b>  | C <sub>20</sub> H <sub>21</sub> NO <sub>3</sub> S (355.45)                              | 67.58        | 5.96 | 3.94  |  | 67.30       | 5.94 | 3.92  |
| <b>3e</b>  | C <sub>21</sub> H <sub>23</sub> NO <sub>3</sub> S (369.48)                              | 68.27        | 6.27 | 3.79  |  | 68.54       | 6.29 | 3.80  |
| <b>4</b>   | C <sub>18</sub> H <sub>15</sub> NO <sub>5</sub> S (357.38)                              | 60.50        | 4.23 | 3.92  |  | 60.74       | 4.25 | 3.93  |
| <b>5</b>   | C <sub>18</sub> H <sub>17</sub> NO <sub>3</sub> S (327.40)                              | 66.04        | 5.23 | 4.28  |  | 66.30       | 5.25 | 4.30  |
| <b>7a</b>  | C <sub>21</sub> H <sub>22</sub> N <sub>2</sub> O <sub>6</sub> S <sub>2</sub> (462.54)   | 54.53        | 4.79 | 6.06  |  | 54.31       | 4.77 | 6.03  |
| <b>7b</b>  | C <sub>23</sub> H <sub>26</sub> N <sub>2</sub> O <sub>6</sub> S <sub>2</sub> (490.59)   | 56.31        | 5.34 | 5.71  |  | 56.08       | 5.32 | 5.69  |
| <b>7c</b>  | C <sub>25</sub> H <sub>30</sub> N <sub>2</sub> O <sub>6</sub> S <sub>2</sub> (518.64)   | 57.90        | 5.83 | 5.40  |  | 57.67       | 5.80 | 5.38  |
| <b>7d</b>  | C <sub>31</sub> H <sub>26</sub> N <sub>2</sub> O <sub>6</sub> S <sub>2</sub> (586.68)   | 63.47        | 4.47 | 4.78  |  | 63.72       | 4.49 | 4.80  |
| <b>7e</b>  | C <sub>33</sub> H <sub>30</sub> N <sub>2</sub> O <sub>6</sub> S <sub>2</sub> (614.73)   | 64.48        | 4.92 | 4.56  |  | 64.22       | 4.90 | 4.54  |
| <b>7f</b>  | C <sub>32</sub> H <sub>28</sub> N <sub>2</sub> O <sub>6</sub> S <sub>2</sub> (600.70)   | 63.98        | 4.70 | 4.66  |  | 63.72       | 4.68 | 4.64  |
| <b>7g</b>  | C <sub>25</sub> H <sub>22</sub> N <sub>2</sub> O <sub>6</sub> S <sub>2</sub> (510.58)   | 58.81        | 4.34 | 5.49  |  | 58.57       | 4.32 | 5.47  |
| <b>8</b>   | C <sub>17</sub> H <sub>13</sub> NO <sub>4</sub> S (327.35)                              | 62.37        | 4.00 | 4.28  |  | 62.62       | 4.01 | 4.30  |
| <b>9</b>   | C <sub>25</sub> H <sub>29</sub> N <sub>2</sub> NaO <sub>6</sub> S <sub>2</sub> (540.62) | 55.54        | 5.41 | 5.18  |  | 55.76       | 5.43 | 5.20  |
| <b>13</b>  | C <sub>23</sub> H <sub>19</sub> NO <sub>8</sub> S (469.46)                              | 58.84        | 4.08 | 2.98  |  | 59.07       | 4.10 | 2.99  |
| <b>17</b>  | C <sub>10</sub> H <sub>10</sub> N <sub>4</sub> O <sub>4</sub> S (282.27)                | 42.55        | 3.57 | 19.85 |  | 42.72       | 3.58 | 19.92 |
| <b>18a</b> | C <sub>12</sub> H <sub>14</sub> N <sub>4</sub> O <sub>4</sub> S (310.33)                | 46.45        | 4.55 | 18.05 |  | 46.36       | 4.53 | 17.98 |
| <b>18b</b> | C <sub>13</sub> H <sub>16</sub> N <sub>4</sub> O <sub>4</sub> S (324.36)                | 48.14        | 4.97 | 17.27 |  | 48.33       | 4.99 | 17.33 |
| <b>18c</b> | C <sub>14</sub> H <sub>18</sub> N <sub>4</sub> O <sub>4</sub> S (338.38)                | 49.69        | 5.36 | 16.56 |  | 49.49       | 5.34 | 16.49 |
| <b>19a</b> | C <sub>14</sub> H <sub>18</sub> N <sub>4</sub> O <sub>4</sub> S (338.38)                | 49.69        | 5.36 | 16.56 |  | 49.49       | 5.34 | 16.49 |
| <b>19b</b> | C <sub>16</sub> H <sub>22</sub> N <sub>4</sub> O <sub>4</sub> S (366.44)                | 52.44        | 6.05 | 15.29 |  | 59.28       | 3.97 | 5.53  |
| <b>19c</b> | C <sub>19</sub> H <sub>28</sub> N <sub>4</sub> O <sub>4</sub> S (408.52)                | 55.86        | 6.91 | 13.71 |  | 55.64       | 6.88 | 16.65 |
| <b>23</b>  | C <sub>17</sub> H <sub>16</sub> N <sub>4</sub> O <sub>4</sub> S (372.40)                | 54.83        | 4.33 | 15.05 |  | 54.61       | 4.31 | 14.99 |
| <b>24</b>  | C <sub>24</sub> H <sub>22</sub> N <sub>4</sub> O <sub>4</sub> S (462.52)                | 62.32        | 4.79 | 12.11 |  | 62.56       | 4.80 | 12.16 |
| <b>28</b>  | C <sub>18</sub> H <sub>18</sub> N <sub>4</sub> O <sub>4</sub> S (386.43)                | 55.95        | 4.70 | 14.50 |  | 55.72       | 4.68 | 14.44 |
| <b>29</b>  | C <sub>26</sub> H <sub>26</sub> N <sub>4</sub> O <sub>4</sub> S (490.58)                | 63.66        | 5.34 | 11.42 |  | 63.91       | 5.36 | 11.46 |
| <b>30</b>  | C <sub>25</sub> H <sub>24</sub> N <sub>4</sub> O <sub>4</sub> S (476.55)                | 63.01        | 5.08 | 11.76 |  | 63.26       | 5.10 | 11.80 |

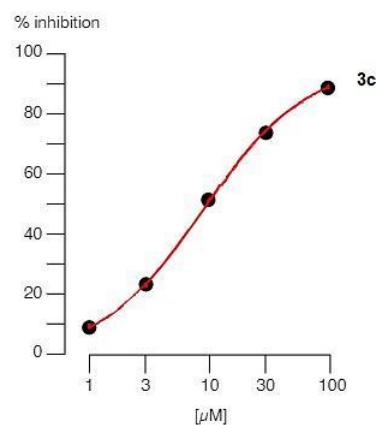

**Figure S1.** Quantitative analysis of the % inhibition of Panx1-mediated membrane currents in oocytes for compound **3c**.

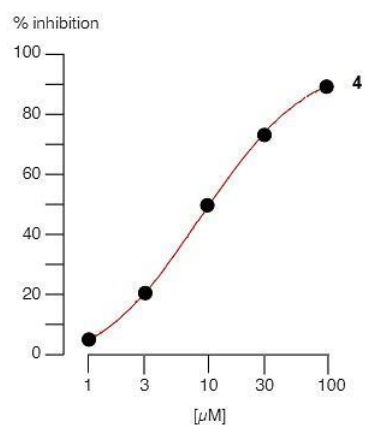

**Figure S2.** Quantitative analysis of the % inhibition of Panx1-mediated membrane currents in oocytes for compound **4**.

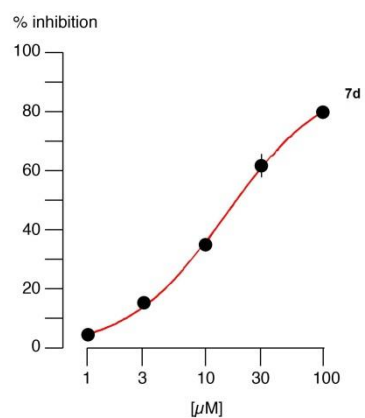

**Figure S3.** Quantitative analysis of the % inhibition of Panx1-mediated membrane currents in oocytes for compound **7d**.
